# Supplementary material
Source: PubMed Central journal article supplement (PMC7164537)
Supplement: glz141_suppl_supplementary_material.pdf [file glz141_suppl_supplementary_material.pdf]

|                        | Young       | Old         | Old n-3     | Young v. Old |       | Old n-3 v. Old |              |
|------------------------|-------------|-------------|-------------|--------------|-------|----------------|--------------|
|                        | N=12        | N=12        | N=12        | ratio        | Adj P | ratio          | Adj P        |
| 2-Aminobutyrate        | 26.0 ± 2.1  | 27.7 ± 1.8  | 28.1 ± 1.1  | 0.94         | 0.861 | 1.01           | 0.908        |
| 2-Hydroxybutyrate      | 44.1 ± 2.9  | 46.6 ± 3.5  | 43.9 ± 2.6  | 0.95         | 0.861 | 0.95           | 0.718        |
| 2-Hydroxyisovalerate   | 6.88 ± 0.74 | 5.35 ± 0.68 | 5.23 ± 0.48 | 1.29         | 0.358 | 0.99           | 0.924        |
| 2-Oxoisovalerate       | 13.3 ± 0.5  | 13.4 ± 0.7  | 12.2 ± 0.4  | 0.99         | 0.950 | 0.91           | 0.336        |
| 2-Oxoglutarate         | 5.55 ± 0.60 | 7.10 ± 0.83 | 7.38 ± 0.72 | 0.74         | 0.370 | 1.13           | 0.79         |
| 2-Oxoisocaproate       | 30.5 ± 1.47 | 25.7 ± 1.5  | 22.8 ± 1.1  | 1.19         | 0.179 | 0.90           | 0.105        |
| 3-Hydroxybutyrate      | 76.2 ± 12.6 | 87.9 ± 26.2 | 124 ± 22    | 0.87         | 0.917 | 1.29           | 0.718        |
| 3-Hydroxyisobutyrate   | 16.6 ± 1.0  | 16.4 ± 1.2  | 14.8 ± 1.1  | 1.01         | 0.950 | 0.91           | 0.336        |
| 3-Methyl-2-oxovalerate | 23.0 ± 1.0  | 19.1 ± 0.7  | 17.1 ± 0.6  | 1.20         | 0.090 | 0.89           | <b>0.053</b> |
| Acetate                | 105 ± 11    | 92.0 ± 11.9 | 103 ± 10    | 1.15         | 0.752 | 1.12           | 0.099        |
| Acetoacetate           | 22.1 ± 2.6  | 24.6 ± 6.6  | 28.6 ± 5.4  | 0.90         | 0.917 | 1.17           | 0.746        |
| Acetone                | 16.4 ± 3.3  | 15.6 ± 3.1  | 23.1 ± 4.2  | 1.05         | 0.950 | 1.38           | 0.379        |
| Alanine                | 215 ± 21    | 225 ± 17    | 203 ± 17    | 0.96         | 0.917 | 0.91           | 0.501        |
| Asparagine             | 36.7 ± 2.5  | 37.1 ± 2.8  | 43.4 ± 4.0  | 0.99         | 0.950 | 1.18           | 0.393        |
| Betaine                | 36.9 ± 3.5  | 39.3 ± 2.4  | 44.5 ± 2.9  | 0.94         | 0.861 | 1.13           | 0.099        |
| Choline                | 5.78 ± 0.75 | 5.75 ± 0.33 | 6.23 ± 0.70 | 1.00         | 0.977 | 1.08           | 0.746        |
| Citrate                | 101 ± 6     | 134 ± 8     | 130 ± 8     | 0.76         | 0.057 | 0.96           | 0.746        |
| Creatine               | 39.4 ± 3.2  | 50.6 ± 3.8  | 55.2 ± 4.0  | 0.78         | 0.179 | 1.07           | 0.718        |
| Creatinine             | 61.9 ± 3.0  | 66.6 ± 2.9  | 66.0 ± 2.5  | 0.93         | 0.585 | 1.00           | 0.908        |
| Formate                | 49.2 ± 3.5  | 42.3 ± 3.62 | 44.5 ± 2.8  | 1.16         | 0.402 | 1.08           | 0.718        |
| Glucose                | 4070 ± 64   | 4297 ± 104  | 4281 ± 106  | 0.95         | 0.234 | 1.00           | 0.807        |
| Glutamate              | 36.8 ± 2.6  | 39.9 ± 2.0  | 44.7 ± 2.8  | 0.92         | 0.666 | 1.08           | 0.344        |
| Glutamine              | 426 ± 17    | 424 ± 18    | 413 ± 13    | 1.01         | 0.950 | 0.97           | 0.746        |
| Glycerol               | 36.8 ± 2.6  | 557 ± 7.68  | 51.9 ± 4.7  | 0.67         | 0.179 | 0.95           | 0.837        |
| Glycine                | 189 ± 13    | 198 ± 9     | 218 ± 11    | 0.95         | 0.861 | 1.09           | 0.226        |
| Histidine              | 84.6 ± 5.4  | 71.8 ± 1.9  | 68.1 ± 2.4  | 1.18         | 0.179 | 0.94           | 0.414        |
| Isoleucine             | 67.7 ± 4.4  | 64.1 ± 3.6  | 62.6 ± 1.7  | 1.06         | 0.861 | 0.98           | 0.746        |
| Lactate                | 562 ± 52    | 727 ± 72    | 622 ± 82    | 0.77         | 0.234 | 0.86           | 0.379        |
| Leucine                | 101 ± 5     | 102 ± 3     | 101 ± 4     | 0.99         | 0.950 | 0.98           | 0.863        |
| Lysine                 | 128 ± 6     | 135 ± 4     | 131 ± 5     | 0.95         | 0.666 | 0.99           | 0.863        |
| Mannose                | 56.6 ± 2.3  | 57.1 ± 1.8  | 58.2 ± 1.8  | 0.99         | 0.950 | 1.03           | 0.718        |
| Methionine             | 20.7 ± 1.4  | 21.3 ± 0.9  | 19.2 ± 0.8  | 0.97         | 0.917 | 0.89           | 0.336        |
| N,N-Dimethylglycine    | 2.59 ± 0.24 | 3.30 ± 0.21 | 3.78 ± 0.27 | 0.79         | 0.179 | 1.13           | 0.336        |
| Ornithine              | 30.1 ± 2.4  | 39.0 ± 4.1  | 36.3 ± 2.2  | 0.77         | 0.234 | 0.92           | 0.703        |
| Phenylalanine          | 45.4 ± 2.0  | 50.1 ± 1.9  | 50.1 ± 2.3  | 0.91         | 0.272 | 1.02           | 0.746        |
| Proline                | 185 ± 13    | 187 ± 22    | 182 ± 14    | 0.99         | 0.950 | 0.98           | 0.807        |
| Pyruvate               | 70.9 ± 7.7  | 75.5 ± 8.7  | 63.4 ± 8.3  | 0.94         | 0.917 | 0.84           | 0.105        |
| Serine                 | 91.1 ± 5.6  | 77.7 ± 4.5  | 85.1 ± 6.1  | 1.17         | 0.235 | 1.09           | 0.559        |
| Succinate              | 3.87 ± 0.30 | 3.63 ± 0.23 | 3.76 ± 0.20 | 1.07         | 0.861 | 1.02           | 0.908        |
| Threonine              | 140 ± 9     | 120 ± 6     | 114 ± 8     | 1.16         | 0.272 | 0.96           | 0.809        |
| Tryptophan             | 47.4 ± 1.8  | 42.2 ± 1.5  | 39.3 ± 1.6  | 1.12         | 0.179 | 0.92           | 0.336        |
| Tyrosine               | 55.7 ± 3.9  | 67.3 ± 3.9  | 63.9 ± 3.0  | 0.83         | 0.179 | 0.94           | 0.648        |

|                   |            |            |            |      |              |      |              |
|-------------------|------------|------------|------------|------|--------------|------|--------------|
| Urea              | 1078 ± 64  | 1535 ± 106 | 1513 ± 116 | 0.70 | <b>0.056</b> | 1.00 | <i>0.940</i> |
| Valine            | 220 ± 11   | 214 ± 7    | 209 ± 8    | 1.03 | <i>0.917</i> | 0.98 | <i>0.718</i> |
| myo-Inositol      | 20.7 ± 2.5 | 28.2 ± 1.2 | 29.4 ± 3.3 | 0.74 | <i>0.153</i> | 1.05 | <i>0.837</i> |
| π-Methylhistidine | 18.3 ± 3.5 | 32.7 ± 3.7 | 33.7 ± 3.9 | 0.56 | <i>0.118</i> | 1.00 | <i>0.951</i> |
| Unknown**         | ND         | ND         | 50.9 ± 5.6 |      |              |      |              |

**Supplemental Table 1. <sup>1</sup>H NMR small metabolite profiling.** Data are shown as mean ± SEM with p-values adjusted for multiple comparisons using the Benjamini-Hochberg Adjustment. ND, not detected.

|                        | Young<br>N=12 | Old<br>N=12 | Old n-3<br>N=12 | Young v. Old |       | Old n-3 v. Old |              |
|------------------------|---------------|-------------|-----------------|--------------|-------|----------------|--------------|
|                        |               |             |                 | ratio        | Adj P | ratio          | Adj P        |
| <b>Acylcarnitines</b>  |               |             |                 |              |       |                |              |
| AC(0:0)                | 41.1 ± 2.7    | 45.2 ± 1.3  | 41.7 ± 2.1      | 0.90         | 0.661 | 0.92           | 0.290        |
| AC(2:0)                | 6.10 ± 0.73   | 7.93 ± 0.62 | 8.06 ± 0.49     | 0.76         | 0.609 | 1.01           | 0.899        |
| AC(3:0)                | 0.51 ± 0.06   | 0.41 ± 0.04 | 0.38 ± 0.03     | 1.23         | 0.661 | 0.93           | 0.515        |
| <b>Amino Acids</b>     |               |             |                 |              |       |                |              |
| Alanine                | 253 ± 25      | 266 ± 21    | 239 ± 20        | 0.93         | 0.896 | 0.89           | 0.274        |
| Arginine               | 74.2 ± 6.4    | 72.3 ± 4.2  | 71.5 ± 5.3      | 1.03         | 0.948 | 0.98           | 0.876        |
| Asparagine             | 44.9 ± 2.3    | 41.1 ± 2.1  | 40.3 ± 1.9      | 1.10         | 0.661 | 0.97           | 0.694        |
| Aspartate              | 5.36 ± 0.25   | 5.18 ± 0.25 | 5.58 ± 0.58     | 1.04         | 0.873 | 1.06           | 0.712        |
| Citrate                | 28.8 ± 1.9    | 41.7 ± 3.2  | 38.5 ± 1.7      | 0.68         | 0.232 | 0.91           | 0.343        |
| Glutamine              | 634 ± 31      | 698 ± 14    | 683 ± 15        | 0.91         | 0.609 | 0.98           | 0.567        |
| Glutamate              | 57.7 ± 3.1    | 61.3 ± 3.8  | 64.5 ± 3.4      | 0.96         | 0.836 | 1.06           | 0.393        |
| Glycine                | 216 ± 14      | 237 ± 10    | 258 ± 13        | 0.92         | 0.661 | 1.08           | 0.105        |
| Histidine              | 90.2 ± 5.7    | 79.2 ± 2.2  | 76.0 ± 2.2      | 1.12         | 0.609 | 0.95           | 0.447        |
| Isoleucine             | 94.2 ± 5.5    | 92.7 ± 4.4  | 88.0 ± 2.1      | 1.01         | 0.963 | 0.95           | 0.450        |
| Lysine                 | 180 ± 9       | 185 ± 6     | 186 ± 7         | 0.97         | 0.896 | 1.01           | 0.793        |
| Methionine             | 24.0 ± 1.1    | 21.6 ± 0.9  | 21.0 ± 0.3      | 1.10         | 0.609 | 0.96           | 0.659        |
| Ornithine              | 53.5 ± 3.9    | 67.3 ± 4.6  | 65.9 ± 4.1      | 0.80         | 0.505 | 0.98           | 0.838        |
| Phenylalanine          | 54.4 ± 1.7    | 58.8 ± 2.5  | 54.8 ± 1.44     | 0.92         | 0.661 | 0.92           | 0.119        |
| Proline                | 177 ± 13      | 195 ± 25    | 189 ± 13        | 0.89         | 0.836 | 0.96           | 0.712        |
| Serine                 | 107 ± 4       | 94.1 ± 5.7  | 95.2 ± 4.9      | 1.14         | 0.609 | 1.00           | 0.751        |
| Threonine              | 135 ± 10      | 117 ± 5     | 113 ± 7         | 1.16         | 0.648 | 0.96           | 0.567        |
| Tryptophan             | 54.9 ± 2.0    | 47.0 ± 2.0  | 42.4 ± 2.2      | 1.18         | 0.407 | 0.89           | 0.120        |
| Tyrosine               | 51.3 ± 3.3    | 62.3 ± 3.8  | 58.6 ± 2.3      | 0.82         | 0.518 | 0.93           | 0.356        |
| Valine                 | 274 ± 13      | 270 ± 9     | 264 ± 9         | 1.01         | 0.932 | 0.98           | 0.556        |
| xLeucine               | 191 ± 1.      | 185 ± 9     | 181 ± 7         | 1.03         | 0.896 | 0.98           | 0.692        |
| <b>Biogenic Amines</b> |               |             |                 |              |       |                |              |
| ADMA                   | 0.46 ± 0.02   | 0.51 ± 0.01 | 0.52 ± 0.01     | 0.90         | 0.609 | 1.02           | 0.576        |
| Creatinine             | 70.1 ± 3.6    | 73.8 ± 3.9  | 73.8 ± 3.3      | 0.93         | 0.836 | 0.99           | 0.983        |
| Kynurenine             | 1.68 ± 0.07   | 2.37 ± 0.21 | 2.09 ± 0.22     | 0.70         | 0.297 | 0.89           | <b>0.013</b> |
| Sarcosine              | 3.90 ± 0.44   | 3.52 ± 0.47 | 4.08 ± 0.53     | 1.11         | 0.861 | 1.18           | 0.536        |
| SDMA                   | 0.42 ± 0.02   | 0.55 ± 0.03 | 0.57 ± 0.03     | 0.76         | 0.117 | 1.03           | 0.437        |
| Serotonin              | 0.12 ± 0.03   | 0.17 ± 0.03 | 0.17 ± 0.04     | 0.80         | 0.661 | 0.95           | 0.963        |
| t4-OH-Pro              | 8.92 ± 0.53   | 8.98 ± 0.40 | 11.6 ± 0.5      | 1.01         | 0.996 | 1.30           | <b>0.001</b> |
| Taurine                | 49.5 ± 3.4    | 56.8 ± 2.3  | 55.0 ± 3.9      | 0.89         | 0.609 | 0.95           | 0.712        |

**Supplemental Table 2: Amines and acylcarnitines.** Data are shown as mean ± SEM with p values adjusted for multiple comparisons using the Benjamini-Hochberg Adjustment.

|                             | Young<br>N=12 | Old<br>N=12 | Old n-3<br>N=12 | Young v. Old |       | Old n-3 v. Old |              |
|-----------------------------|---------------|-------------|-----------------|--------------|-------|----------------|--------------|
|                             |               |             |                 | ratio        | Adj P | ratio          | Adj P        |
| <b>Glycerophospholipids</b> |               |             |                 |              |       |                |              |
| LPC(16:0)                   | 50.8 ± 2.95   | 42.2 ± 1.9  | 42.3 ± 2.1      | 1.21         | 0.470 | 1.00           | 0.963        |
| LPC(16:1)                   | 1.26 ± 0.07   | 1.06 ± 0.04 | 0.91 ± 0.04     | 1.17         | 0.443 | 0.84           | <b>0.010</b> |
| LPC(17:0)                   | 1.10 ± 0.11   | 0.94 ± 0.07 | 0.97 ± 0.07     | 1.16         | 0.661 | 1.01           | 0.692        |
| LPC(18:0)                   | 35.0 ± 3.4    | 33.1 ± 2.0  | 33.7 ± 2.5      | 1.07         | 0.896 | 1.00           | 0.790        |
| LPC(18:1)                   | 22.8 ± 1.8    | 19.2 ± 1.4  | 17.6 ± 1.3      | 1.18         | 0.633 | 0.91           | 0.095        |
| LPC(18:2)                   | 38.8 ± 4.3    | 28.9 ± 2.7  | 25.4 ± 2.1      | 1.33         | 0.609 | 0.87           | <b>0.023</b> |
| LPC(20:4)                   | 5.5 ± 0.7     | 4.0 ± 0.4   | 3.1 ± 0.3       | 1.32         | 0.609 | 0.76           | <b>0.003</b> |
| LPC(22:6)                   | 1.70 ± 0.20   | 1.32 ± 0.11 | 1.82 ± 0.14     | 1.28         | 0.609 | 1.37           | <b>0.001</b> |
| PC(30:0)                    | 2.57 ± 0.21   | 2.24 ± 0.20 | 2.19 ± 0.26     | 1.11         | 0.665 | 0.96           | 0.800        |
| PC(30:3)                    | 3.27 ± 0.40   | 4.34 ± 0.29 | 2.82 ± 0.43     | 0.74         | 0.518 | 0.62           | 0.065        |
| PC(32:0)                    | 13.1 ± 0.9    | 13.6 ± 0.9  | 14.7 ± 1.0      | 0.96         | 0.896 | 1.08           | 0.139        |
| PC(32:1)                    | 11.8 ± 1.2    | 11.3 ± 0.9  | 9.41 ± 0.75     | 1.03         | 0.896 | 0.82           | <b>0.007</b> |
| PC(32:2)                    | 4.45 ± 0.31   | 4.48 ± 0.29 | 3.55 ± 0.24     | 0.98         | 0.996 | 0.78           | <b>0.009</b> |
| PC(33:0)                    | 0.86 ± 0.06   | 0.83 ± 0.07 | 0.83 ± 0.06     | 1.02         | 0.896 | 0.99           | 0.963        |
| PC(33:1)                    | 3.03 ± 0.13   | 2.94 ± 0.22 | 2.52 ± 0.15     | 1.02         | 0.896 | 0.85           | <b>0.026</b> |
| PC(33:2)                    | 3.36 ± 0.24   | 3.49 ± 0.22 | 2.90 ± 0.19     | 0.96         | 0.896 | 0.82           | <b>0.009</b> |
| PC(33:3)                    | 1.17 ± 0.06   | 1.22 ± 0.06 | 1.19 ± 0.05     | 0.96         | 0.870 | 0.96           | 0.803        |
| PC(34:1)                    | 191 ± 10      | 193 ± 11    | 171 ± 9         | 0.99         | 0.996 | 0.88           | <b>0.023</b> |
| PC(34:2)                    | 408 ± 23      | 435 ± 22    | 373 ± 21        | 0.94         | 0.773 | 0.85           | <b>0.001</b> |
| PC(34:3)                    | 10.9 ± 0.7    | 12.0 ± 0.6  | 8.8 ± 0.5       | 0.91         | 0.665 | 0.72           | <b>0.001</b> |
| PC(34:4)                    | 1.11 ± 0.10   | 1.05 ± 0.12 | 0.77 ± 0.08     | 1.03         | 0.899 | 0.72           | <b>0.024</b> |
| PC(35:1)                    | 3.04 ± 0.13   | 3.32 ± 0.22 | 3.05 ± 0.17     | 0.91         | 0.665 | 0.91           | 0.133        |
| PC(35:2)                    | 8.27 ± 0.53   | 9.55 ± 0.54 | 8.23 ± 0.48     | 0.86         | 0.609 | 0.85           | <b>0.008</b> |
| PC(35:3)                    | 2.43 ± 0.14   | 2.45 ± 0.13 | 1.86 ± 0.11     | 0.99         | 0.996 | 0.75           | <b>0.003</b> |
| PC(35:4)                    | 0.98 ± 0.05   | 0.89 ± 0.12 | 0.77 ± 0.07     | 1.07         | 0.836 | 0.84           | 0.121        |
| PC(36:1)                    | 28.0 ± 4.0    | 33.4 ± 5.0  | 36.5 ± 2.6      | 0.88         | 0.785 | 1.13           | 0.567        |
| PC(36:2)                    | 191 ± 10      | 214 ± 9     | 183 ± 10        | 0.90         | 0.609 | 0.85           | <b>0.003</b> |
| PC(36:3)                    | 128 ± 10      | 132 ± 6     | 90.7 ± 4.2      | 0.98         | 0.920 | 0.69           | <b>0.001</b> |
| PC(36:4)                    | 159 ± 11      | 164 ± 18    | 132 ± 11        | 0.96         | 0.961 | 0.80           | <b>0.011</b> |
| PC(37:1)                    | 0.71 ± 0.05   | 0.90 ± 0.09 | 0.58 ± 0.06     | 0.78         | 0.609 | 0.68           | <b>0.020</b> |
| PC(37:2)                    | 0.96 ± 0.06   | 1.10 ± 0.06 | 0.93 ± 0.06     | 0.87         | 0.609 | 0.84           | <b>0.011</b> |
| PC(37:3)                    | 1.83 ± 0.14   | 2.08 ± 0.14 | 1.38 ± 0.09     | 0.87         | 0.661 | 0.66           | <b>0.001</b> |
| PC(37:4)                    | 4.57 ± 0.20   | 5.21 ± 0.54 | 4.08 ± 0.38     | 0.87         | 0.665 | 0.77           | <b>0.009</b> |
| PC(37:5)                    | 4.01 ± 0.22   | 4.07 ± 0.21 | 5.14 ± 0.33     | 0.99         | 0.965 | 1.24           | <b>0.041</b> |
| PC(37:6)                    | 1.49 ± 0.10   | 1.38 ± 0.15 | 1.70 ± 0.11     | 1.07         | 0.836 | 1.20           | 0.081        |
| PC(38:0)                    | 34.0 ± 3.0    | 33.8 ± 3.5  | 32.1 ± 2.9      | 1.05         | 0.996 | 1.00           | 0.708        |
| PC(38:1)                    | 5.28 ± 0.65   | 5.19 ± 0.53 | 5.16 ± 0.45     | 1.04         | 0.996 | 1.04           | 0.963        |
| PC(38:2)                    | 3.57 ± 0.63   | 3.67 ± 0.63 | 3.48 ± 0.34     | 1.04         | 0.996 | 0.99           | 0.807        |
| PC(38:3)                    | 35.2 ± 2.4    | 39.1 ± 2.6  | 25.4 ± 2.0      | 0.90         | 0.665 | 0.65           | <b>0.001</b> |
| PC(38:4)                    | 96.8 ± 5.4    | 111 ± 11    | 89.5 ± 7.5      | 0.86         | 0.665 | 0.80           | <b>0.014</b> |
| PC(38:5)                    | 42.8 ± 2.8    | 45.5 ± 3.7  | 90.3 ± 5.7      | 0.94         | 0.861 | 1.95           | <b>0.001</b> |
| PC(38:6)                    | 45.2 ± 5.9    | 50.0 ± 4.8  | 96.9 ± 6.6      | 0.92         | 0.836 | 1.92           | <b>0.001</b> |
| PC(38:7)                    | 2.97 ± 0.51   | 2.72 ± 0.36 | 3.97 ± 0.47     | 1.13         | 0.896 | 1.41           | <b>0.050</b> |
| PC(39:3)                    | 0.95 ± 0.04   | 0.94 ± 0.06 | 0.76 ± 0.04     | 1.00         | 0.979 | 0.79           | <b>0.009</b> |
| PC(39:4)                    | 0.99 ± 0.05   | 0.99 ± 0.05 | 1.29 ± 0.07     | 1.01         | 0.996 | 1.28           | <b>0.010</b> |
| PC(39:5)                    | 0.57 ± 0.06   | 0.65 ± 0.06 | 1.04 ± 0.09     | 0.87         | 0.665 | 1.56           | <b>0.003</b> |

|            |             |             |             |      |       |      |              |
|------------|-------------|-------------|-------------|------|-------|------|--------------|
| PC(39:6)   | 1.65 ± 0.15 | 1.90 ± 0.15 | 2.88 ± 0.21 | 0.87 | 0.661 | 1.47 | <b>0.002</b> |
| PC(39:7)   | 0.78 ± 0.08 | 0.79 ± 0.11 | 1.43 ± 0.11 | 0.99 | 0.996 | 1.73 | <b>0.007</b> |
| PC(40:2)   | 0.80 ± 0.11 | 0.54 ± 0.09 | 0.49 ± 0.06 | 1.46 | 0.609 | 0.91 | 0.583        |
| PC(40:4)   | 2.40 ± 0.30 | 2.92 ± 0.22 | 1.28 ± 0.25 | 0.83 | 0.661 | 0.48 | <b>0.005</b> |
| PC(40:5)   | 9.77 ± 0.79 | 11.4 ± 0.9  | 16.2 ± 1.5  | 0.86 | 0.661 | 1.36 | <b>0.020</b> |
| PC(40:6)   | 14.8 ± 2.0  | 18.5 ± 1.7  | 38.3 ± 3.0  | 0.83 | 0.661 | 2.03 | <b>0.001</b> |
| PC(40:7)   | 1.86 ± 0.45 | 1.86 ± 0.59 | 4.37 ± 0.53 | 1.24 | 0.997 | 2.71 | <b>0.001</b> |
| PC(40:8)   | 1.29 ± 0.13 | 1.19 ± 0.21 | 0.83 ± 0.24 | 1.04 | 0.896 | 0.52 | 0.406        |
| PC(41:4)   | 0.72 ± 0.06 | 0.71 ± 0.08 | 0.73 ± 0.08 | 0.99 | 0.996 | 0.97 | 0.849        |
| PC(42:3)   | 2.41 ± 0.38 | 1.51 ± 0.29 | 2.16 ± 0.10 | 1.64 | 0.609 | 1.49 | 0.114        |
| PC(42:4)   | 0.41 ± 0.05 | 0.46 ± 0.05 | 0.42 ± 0.07 | 0.90 | 0.824 | 0.89 | 0.712        |
| PC(42:6)   | 0.18 ± 0.09 | 0.60 ± 0.13 | 0.74 ± 0.06 | 0.33 | 0.443 | 1.32 | 0.260        |
| PC(42:7)   | 0.75 ± 0.12 | 0.61 ± 0.08 | 0.66 ± 0.11 | 1.28 | 0.746 | 1.05 | 0.790        |
| PC(42:10)  | 0.66 ± 0.18 | 0.94 ± 0.22 | 0.49 ± 0.11 | 0.65 | 0.729 | 0.52 | 0.107        |
| PC(44:1)   | 1.60 ± 0.21 | 1.39 ± 0.28 | 0.71 ± 0.08 | 1.10 | 0.861 | 0.50 | <b>0.040</b> |
| PC(46:2)   | 1.86 ± 0.28 | 1.62 ± 0.19 | 0.79 ± 0.11 | 1.14 | 0.836 | 0.47 | <b>0.005</b> |
| PC-O(32:0) | 1.76 ± 0.14 | 1.34 ± 0.13 | 0.10 ± 0.04 | 1.29 | 0.518 | 0.07 | <b>0.001</b> |
| PC-O(32:1) | 1.40 ± 0.24 | 1.04 ± 0.17 | 1.17 ± 0.18 | 1.26 | 0.661 | 1.04 | 0.614        |
| PC-O(34:0) | 0.60 ± 0.04 | 0.59 ± 0.04 | 0.46 ± 0.03 | 1.02 | 0.996 | 0.78 | <b>0.006</b> |
| PC-O(34:1) | 4.50 ± 0.34 | 4.76 ± 0.33 | 3.91 ± 0.23 | 0.95 | 0.869 | 0.82 | <b>0.011</b> |
| PC-O(34:2) | 8.37 ± 0.68 | 8.95 ± 0.61 | 6.90 ± 0.46 | 0.93 | 0.836 | 0.76 | <b>0.002</b> |
| PC-O(34:3) | 9.22 ± 0.80 | 9.24 ± 0.71 | 7.97 ± 0.55 | 0.99 | 0.996 | 0.85 | <b>0.011</b> |
| PC-O(34:4) | 0.40 ± 0.07 | 0.47 ± 0.07 | 0.37 ± 0.07 | 0.90 | 0.836 | 0.80 | 0.282        |
| PC-O(35:3) | 1.05 ± 0.07 | 1.01 ± 0.08 | 0.87 ± 0.06 | 1.03 | 0.896 | 0.85 | 0.090        |
| PC-O(36:2) | 2.63 ± 0.17 | 2.73 ± 0.17 | 1.92 ± 0.11 | 0.96 | 0.896 | 0.70 | <b>0.001</b> |
| PC-O(36:3) | 7.26 ± 0.53 | 7.55 ± 0.52 | 5.26 ± 0.32 | 0.94 | 0.896 | 0.69 | <b>0.001</b> |
| PC-O(36:4) | 19.5 ± 1.4  | 19.2 ± 1.9  | 13.6 ± 1.1  | 0.99 | 0.996 | 0.70 | <b>0.002</b> |
| PC-O(36:5) | 13.7 ± 1.2  | 14.3 ± 1.6  | 16.1 ± 1.2  | 0.93 | 0.920 | 1.12 | 0.145        |
| PC-O(38:3) | 1.01 ± 0.20 | 0.81 ± 0.14 | 0.39 ± 0.13 | 1.31 | 0.795 | 0.40 | <b>0.010</b> |
| PC-O(38:4) | 10.1 ± 0.6  | 10.1 ± 0.7  | 5.7 ± 0.3   | 0.99 | 0.996 | 0.56 | <b>0.001</b> |
| PC-O(38:5) | 18.3 ± 1.3  | 19.8 ± 1.8  | 16.2 ± 1.0  | 0.91 | 0.836 | 0.82 | <b>0.027</b> |
| PC-O(38:6) | 5.73 ± 0.46 | 6.63 ± 0.61 | 11.8 ± 0.7  | 0.86 | 0.661 | 1.76 | <b>0.001</b> |
| PC-O(40:4) | 1.19 ± 0.09 | 1.16 ± 0.07 | 0.66 ± 0.03 | 1.03 | 0.920 | 0.57 | <b>0.001</b> |
| PC-O(40:5) | 2.43 ± 0.16 | 2.55 ± 0.15 | 1.92 ± 0.08 | 0.95 | 0.870 | 0.76 | <b>0.003</b> |
| PC-O(40:6) | 2.56 ± 0.23 | 2.92 ± 0.18 | 3.78 ± 0.20 | 0.87 | 0.661 | 1.28 | <b>0.002</b> |
| PC-O(40:7) | 1.44 ± 0.20 | 1.88 ± 0.17 | 3.43 ± 0.21 | 0.77 | 0.609 | 1.81 | <b>0.001</b> |
| PC-O(42:4) | 0.58 ± 0.05 | 0.53 ± 0.02 | 0.37 ± 0.02 | 1.10 | 0.743 | 0.69 | <b>0.001</b> |
| PC-O(42:5) | 1.26 ± 0.12 | 1.23 ± 0.09 | 0.89 ± 0.05 | 1.03 | 0.968 | 0.72 | <b>0.003</b> |
| PC-O(42:6) | 0.97 ± 0.09 | 1.04 ± 0.08 | 1.09 ± 0.06 | 0.93 | 0.861 | 1.03 | 0.397        |

**Supplemental Table 3: Phospholipids.** Data are shown as mean ± SEM with p values adjusted for multiple comparisons using the Benjamini-Hochberg Adjustment.

|                      | Young<br>N=12 | Old<br>N=12 | Old n-3<br>N=12 | Young v. Old |       | Old n-3 v. Old |       |
|----------------------|---------------|-------------|-----------------|--------------|-------|----------------|-------|
|                      |               |             |                 | ratio        | Adj P | ratio          | Adj P |
| <b>Sphingolipids</b> |               |             |                 |              |       |                |       |
| Cer(42:1)            | 2.18 ± 0.13   | 2.47 ± 0.14 | 2.27 ± 0.15     | 0.89         | 0.648 | 0.92           | 0.214 |
| SM(32:1)             | 7.30 ± 0.48   | 8.48 ± 0.46 | 8.83 ± 0.51     | 0.85         | 0.609 | 1.02           | 0.484 |
| SM(32:2)             | 0.71 ± 0.03   | 0.82 ± 0.04 | 0.82 ± 0.06     | 0.87         | 0.518 | 0.99           | 0.576 |
| SM(33:1)             | 14.1 ± 0.8    | 15.1 ± 0.8  | 14.1 ± 0.6      | 0.92         | 0.748 | 0.90           | 0.437 |
| SM(34:1)             | 89.1 ± 4.2    | 101 ± 4     | 106 ± 5         | 0.88         | 0.609 | 1.04           | 0.303 |
| SM(34:2)             | 12.4 ± 0.5    | 15.2 ± 0.7  | 15.3 ± 0.9      | 0.82         | 0.297 | 1.00           | 0.803 |
| SM(35:1)             | 2.50 ± 0.11   | 2.82 ± 0.15 | 2.97 ± 0.16     | 0.88         | 0.609 | 1.04           | 0.169 |
| SM(36:0)             | 1.59 ± 0.53   | 1.93 ± 0.65 | 2.07 ± 0.58     | 0.76         | 0.896 | 1.07           | 0.849 |
| SM(36:1)             | 28.5 ± 1.2    | 31.2 ± 2.3  | 32.6 ± 2.1      | 0.92         | 0.678 | 1.03           | 0.328 |
| SM(36:2)             | 5.26 ± 0.20   | 6.02 ± 0.45 | 6.36 ± 0.47     | 0.88         | 0.633 | 1.04           | 0.189 |
| SM(37:1)             | 1.88 ± 0.10   | 2.02 ± 0.18 | 2.11 ± 0.19     | 0.93         | 0.836 | 1.03           | 0.484 |
| SM(38:1)             | 17.3 ± 0.9    | 19.4 ± 1.1  | 18.3 ± 1.0      | 0.89         | 0.648 | 0.92           | 0.401 |
| SM(38:2)             | 6.93 ± 0.30   | 7.73 ± 0.54 | 7.80 ± 0.57     | 0.91         | 0.661 | 1.00           | 0.819 |
| SM(39:1)             | 5.85 ± 0.34   | 6.67 ± 0.51 | 6.89 ± 0.54     | 0.86         | 0.661 | 1.00           | 0.604 |
| SM(39:2)             | 0.90 ± 0.08   | 1.04 ± 0.09 | 1.15 ± 0.13     | 0.86         | 0.665 | 1.11           | 0.343 |
| SM(40:1)             | 11.1 ± 4.0    | 14.0 ± 3.9  | 20.7 ± 4.1      | 0.73         | 0.870 | 1.38           | 0.138 |
| SM(40:2)             | 21.6 ± 1.4    | 26.6 ± 1.4  | 26.3 ± 1.6      | 0.81         | 0.443 | 0.98           | 0.833 |
| SM(41:1)             | 13.0 ± 0.6    | 14.1 ± 0.9  | 14.8 ± 1.0      | 0.91         | 0.665 | 1.03           | 0.335 |
| SM(41:2)             | 9.83 ± 0.40   | 10.9 ± 0.8  | 11.3 ± 0.9      | 0.89         | 0.661 | 1.02           | 0.497 |
| SM(42:1)             | 23.1 ± 1.6    | 24.8 ± 1.3  | 25.5 ± 1.5      | 0.93         | 0.785 | 1.02           | 0.567 |
| SM(42:2)             | 50.4 ± 3.0    | 53.9 ± 3.1  | 55.3 ± 3.4      | 0.94         | 0.785 | 1.02           | 0.567 |
| SM(42:3)             | 23.9 ± 1.4    | 21.1 ± 3.0  | 27.2 ± 1.9      | 1.17         | 0.785 | 1.31           | 0.133 |
| SM(43:1)             | 2.32 ± 0.13   | 2.31 ± 0.27 | 1.94 ± 0.19     | 0.98         | 0.996 | 0.82           | 0.110 |
| SM(43:2)             | 3.09 ± 0.19   | 3.10 ± 0.28 | 3.07 ± 0.27     | 0.99         | 0.996 | 0.97           | 0.849 |
| SM(44:1)             | 1.03 ± 0.08   | 1.13 ± 0.13 | 1.10 ± 0.14     | 0.89         | 0.836 | 0.97           | 0.712 |
| SM(44:2)             | 0.80 ± 0.05   | 0.85 ± 0.09 | 1.02 ± 0.08     | 0.93         | 0.870 | 1.20           | 0.139 |

**Supplemental Table 4: Sphingolipids.** Data are shown as mean ± SEM with p values adjusted for multiple comparisons using the Benjamini-Hochberg Adjustment.

|                      | Young       | Old         | Old n-3     | Young v. Old |       | Old n-3 v. Old |              |
|----------------------|-------------|-------------|-------------|--------------|-------|----------------|--------------|
|                      | N=12        | N=12        | N=12        | ratio        | Adj P | ratio          | Adj P        |
| <b>Cholesterol</b>   |             |             |             |              |       |                |              |
| CE(16:0)             | 132 ± 11    | 155 ± 14    | 172 ± 12    | 0.85         | 0.661 | 1.08           | 0.219        |
| CE(16:1)             | 59.6 ± 3.7  | 71.0 ± 6.4  | 67.6 ± 7.3  | 0.83         | 0.633 | 0.94           | 0.548        |
| CE(18:1)             | 236 ± 49    | 244 ± 58    | 330 ± 89    | 0.97         | 0.996 | 1.43           | 0.218        |
| CE(18:2)             | 3461 ± 238  | 4053 ± 202  | 3789 ± 215  | 0.85         | 0.609 | 0.91           | 0.300        |
| CE(18:3)             | 124 ± 12    | 139 ± 10    | 113 ± 11    | 0.89         | 0.691 | 0.80           | <b>0.009</b> |
| CE(20:4)             | 978 ± 88    | 1205 ± 153  | 1105 ± 106  | 0.79         | 0.661 | 0.90           | 0.349        |
| CE(20:5)             | 108 ± 13    | 115 ± 12    | 970 ± 79    | 0.92         | 0.896 | 8.03           | <b>0.001</b> |
| CE(22:5)             | 53.9 ± 3.7  | 51.5 ± 2.5  | 54.5 ± 3.3  | 1.05         | 0.870 | 1.07           | 0.258        |
| CE(22:6)             | 121 ± 18    | 143 ± 11    | 271 ± 20    | 0.85         | 0.673 | 1.81           | <b>0.001</b> |
| <b>Diglycerides</b>  |             |             |             |              |       |                |              |
| DG(34:1)             | 5.54 ± 0.50 | 5.93 ± 0.63 | 4.48 ± 0.47 | 0.92         | 0.894 | 0.75           | <b>0.011</b> |
| DG(36:2)             | 5.40 ± 0.51 | 6.16 ± 0.60 | 4.47 ± 0.40 | 0.86         | 0.724 | 0.72           | <b>0.011</b> |
| DG(36:3)             | 7.07 ± 0.80 | 8.60 ± 0.71 | 6.58 ± 0.47 | 0.81         | 0.661 | 0.76           | <b>0.015</b> |
| DG(36:4)             | 3.13 ± 0.38 | 3.95 ± 0.33 | 3.15 ± 0.24 | 0.79         | 0.609 | 0.79           | <b>0.025</b> |
| DG(39:0)             | 3.7 ± 0.5   | 4.2 ± 0.5   | 46.6 ± 3.7  | 0.86         | 0.836 | 10.60          | <b>0.001</b> |
| DG(41:1)             | 4.8 ± 0.7   | 5.9 ± 0.6   | 13.0 ± 1.2  | 0.82         | 0.661 | 2.13           | <b>0.001</b> |
| DG(42:0)             | 3.66 ± 0.29 | 3.65 ± 0.36 | 3.43 ± 0.29 | 1.01         | 0.996 | 0.93           | 0.712        |
| DG(42:1)             | 13.8 ± 1.1  | 15.2 ± 1.1  | 13.9 ± 0.8  | 0.92         | 0.748 | 0.90           | 0.497        |
| DG(44:3)             | 5.09 ± 0.53 | 5.67 ± 0.86 | 4.54 ± 0.43 | 0.89         | 0.861 | 0.79           | 0.161        |
| DG-O(32:2)           | 2.85 ± 0.27 | 3.28 ± 0.30 | 2.67 ± 0.24 | 0.86         | 0.673 | 0.81           | <b>0.001</b> |
| DG-O(34:1)           | 11.4 ± 1.3  | 12.5 ± 0.9  | 9.7 ± 0.8   | 0.91         | 0.836 | 0.77           | <b>0.001</b> |
| DG-O(36:4)           | 3.29 ± 0.15 | 3.79 ± 0.14 | 3.51 ± 0.20 | 0.86         | 0.470 | 0.91           | 0.328        |
| <b>Triglycerides</b> |             |             |             |              |       |                |              |
| TG(44:1)             | 2.06 ± 0.20 | 1.56 ± 0.35 | 1.86 ± 0.44 | 1.28         | 0.661 | 1.18           | 0.369        |
| TG(44:2)             | 1.22 ± 0.12 | 0.87 ± 0.19 | 0.74 ± 0.24 | 1.38         | 0.633 | 0.88           | 0.712        |
| TG(48:1)             | 19.3 ± 1.6  | 18.4 ± 2.8  | 14.2 ± 2.7  | 1.02         | 0.925 | 0.77           | <b>0.040</b> |
| TG(48:2)             | 14.0 ± 1.0  | 13.9 ± 2.3  | 10.7 ± 2.0  | 0.96         | 0.996 | 0.76           | <b>0.067</b> |
| TG(48:3)             | 5.94 ± 1.03 | 6.80 ± 1.53 | 2.28 ± 1.23 | 0.87         | 0.896 | 0.36           | <b>0.023</b> |
| TG(49:1)             | 3.86 ± 0.36 | 3.68 ± 0.66 | 2.58 ± 0.74 | 1.01         | 0.954 | 0.70           | 0.056        |
| TG(49:2)             | 2.92 ± 0.25 | 2.86 ± 0.61 | 2.36 ± 0.47 | 0.97         | 0.996 | 0.81           | 0.297        |
| TG(50:1)             | 44.6 ± 4.4  | 44.3 ± 6.3  | 32.2 ± 5.2  | 0.97         | 0.996 | 0.72           | <b>0.024</b> |
| TG(50:2)             | 65.6 ± 5.9  | 69.2 ± 8.4  | 50.1 ± 5.9  | 0.92         | 0.896 | 0.71           | <b>0.015</b> |
| TG(50:3)             | 40.9 ± 2.9  | 44.5 ± 4.9  | 33.8 ± 3.2  | 0.90         | 0.836 | 0.75           | <b>0.020</b> |
| TG(50:4)             | 20.8 ± 1.0  | 22.0 ± 1.6  | 17.9 ± 2.0  | 0.94         | 0.836 | 0.80           | 0.064        |
| TG(51:1)             | 2.25 ± 0.30 | 2.41 ± 0.60 | 0.59 ± 0.32 | 0.91         | 0.948 | 0.26           | <b>0.050</b> |
| TG(51:2)             | 6.68 ± 0.53 | 7.19 ± 1.00 | 6.03 ± 0.78 | 0.91         | 0.896 | 0.83           | 0.139        |
| TG(51:3)             | 6.43 ± 0.53 | 7.11 ± 0.79 | 5.57 ± 0.50 | 0.89         | 0.836 | 0.77           | <b>0.022</b> |
| TG(51:4)             | 2.87 ± 0.24 | 3.21 ± 0.30 | 2.83 ± 0.17 | 0.88         | 0.750 | 0.88           | 0.144        |
| TG(52:2)             | 183 ± 17    | 196 ± 19    | 144 ± 11    | 0.92         | 0.873 | 0.72           | <b>0.011</b> |
| TG(52:3)             | 244 ± 24    | 278 ± 23    | 220 ± 12    | 0.87         | 0.678 | 0.78           | <b>0.022</b> |
| TG(52:4)             | 123 ± 13    | 145 ± 12    | 121 ± 7     | 0.85         | 0.661 | 0.82           | 0.059        |
| TG(52:5)             | 27.0 ± 2.7  | 30.8 ± 2.8  | 27.7 ± 1.8  | 0.88         | 0.724 | 0.89           | 0.318        |
| TG(52:6)             | 3.99 ± 0.51 | 4.77 ± 0.53 | 7.23 ± 0.56 | 0.84         | 0.665 | 1.52           | <b>0.002</b> |
| TG(53:3)             | 5.88 ± 0.56 | 7.01 ± 0.74 | 4.26 ± 1.04 | 0.83         | 0.661 | 0.57           | 0.059        |
| TG(53:4)             | 3.67 ± 0.35 | 4.12 ± 0.38 | 4.04 ± 0.28 | 0.88         | 0.750 | 0.97           | 0.845        |

|          |             |             |              |      |       |      |              |
|----------|-------------|-------------|--------------|------|-------|------|--------------|
| TG(53:5) | 1.44 ± 0.11 | 1.65 ± 0.14 | 1.89 ± 0.18  | 0.86 | 0.661 | 1.13 | 0.318        |
| TG(54:3) | 60.9 ± 6.2  | 67.5 ± 5.4  | 49.8 ± 3.5   | 0.89 | 0.785 | 0.73 | <b>0.010</b> |
| TG(54:4) | 80.6 ± 8.3  | 94.7 ± 5.9  | 70.7 ± 4.9   | 0.85 | 0.661 | 0.73 | <b>0.008</b> |
| TG(54:5) | 62.0 ± 6.1  | 73.4 ± 4.3  | 59.3 ± 3.6   | 0.85 | 0.634 | 0.80 | <b>0.033</b> |
| TG(54:6) | 32.4 ± 3.4  | 38.1 ± 2.7  | 43.1 ± 2.7   | 0.85 | 0.661 | 1.12 | 0.260        |
| TG(54:7) | 6.46 ± 0.92 | 6.41 ± 0.74 | 18.1 ± 1.5   | 1.01 | 0.996 | 2.81 | <b>0.001</b> |
| TG(56:6) | 9.46 ± 0.50 | 10.6 ± 0.8  | 14.0 ± 0.9   | 0.88 | 0.661 | 1.32 | <b>0.005</b> |
| TG(56:7) | 11.9 ± 0.9  | 13.4 ± 1.1  | 30.7 ± 2.1   | 0.87 | 0.665 | 2.26 | <b>0.001</b> |
| TG(56:8) | 4.27 ± 0.57 | 5.27 ± 0.55 | 24.90 ± 2.16 | 0.80 | 0.661 | 4.71 | <b>0.001</b> |

**Supplemental Table 4: Cholesterol, diglycerides, triglycerides.** Data are shown as mean ± SEM with p values adjusted for multiple comparisons using the Benjamini-Hochberg Adjustment.



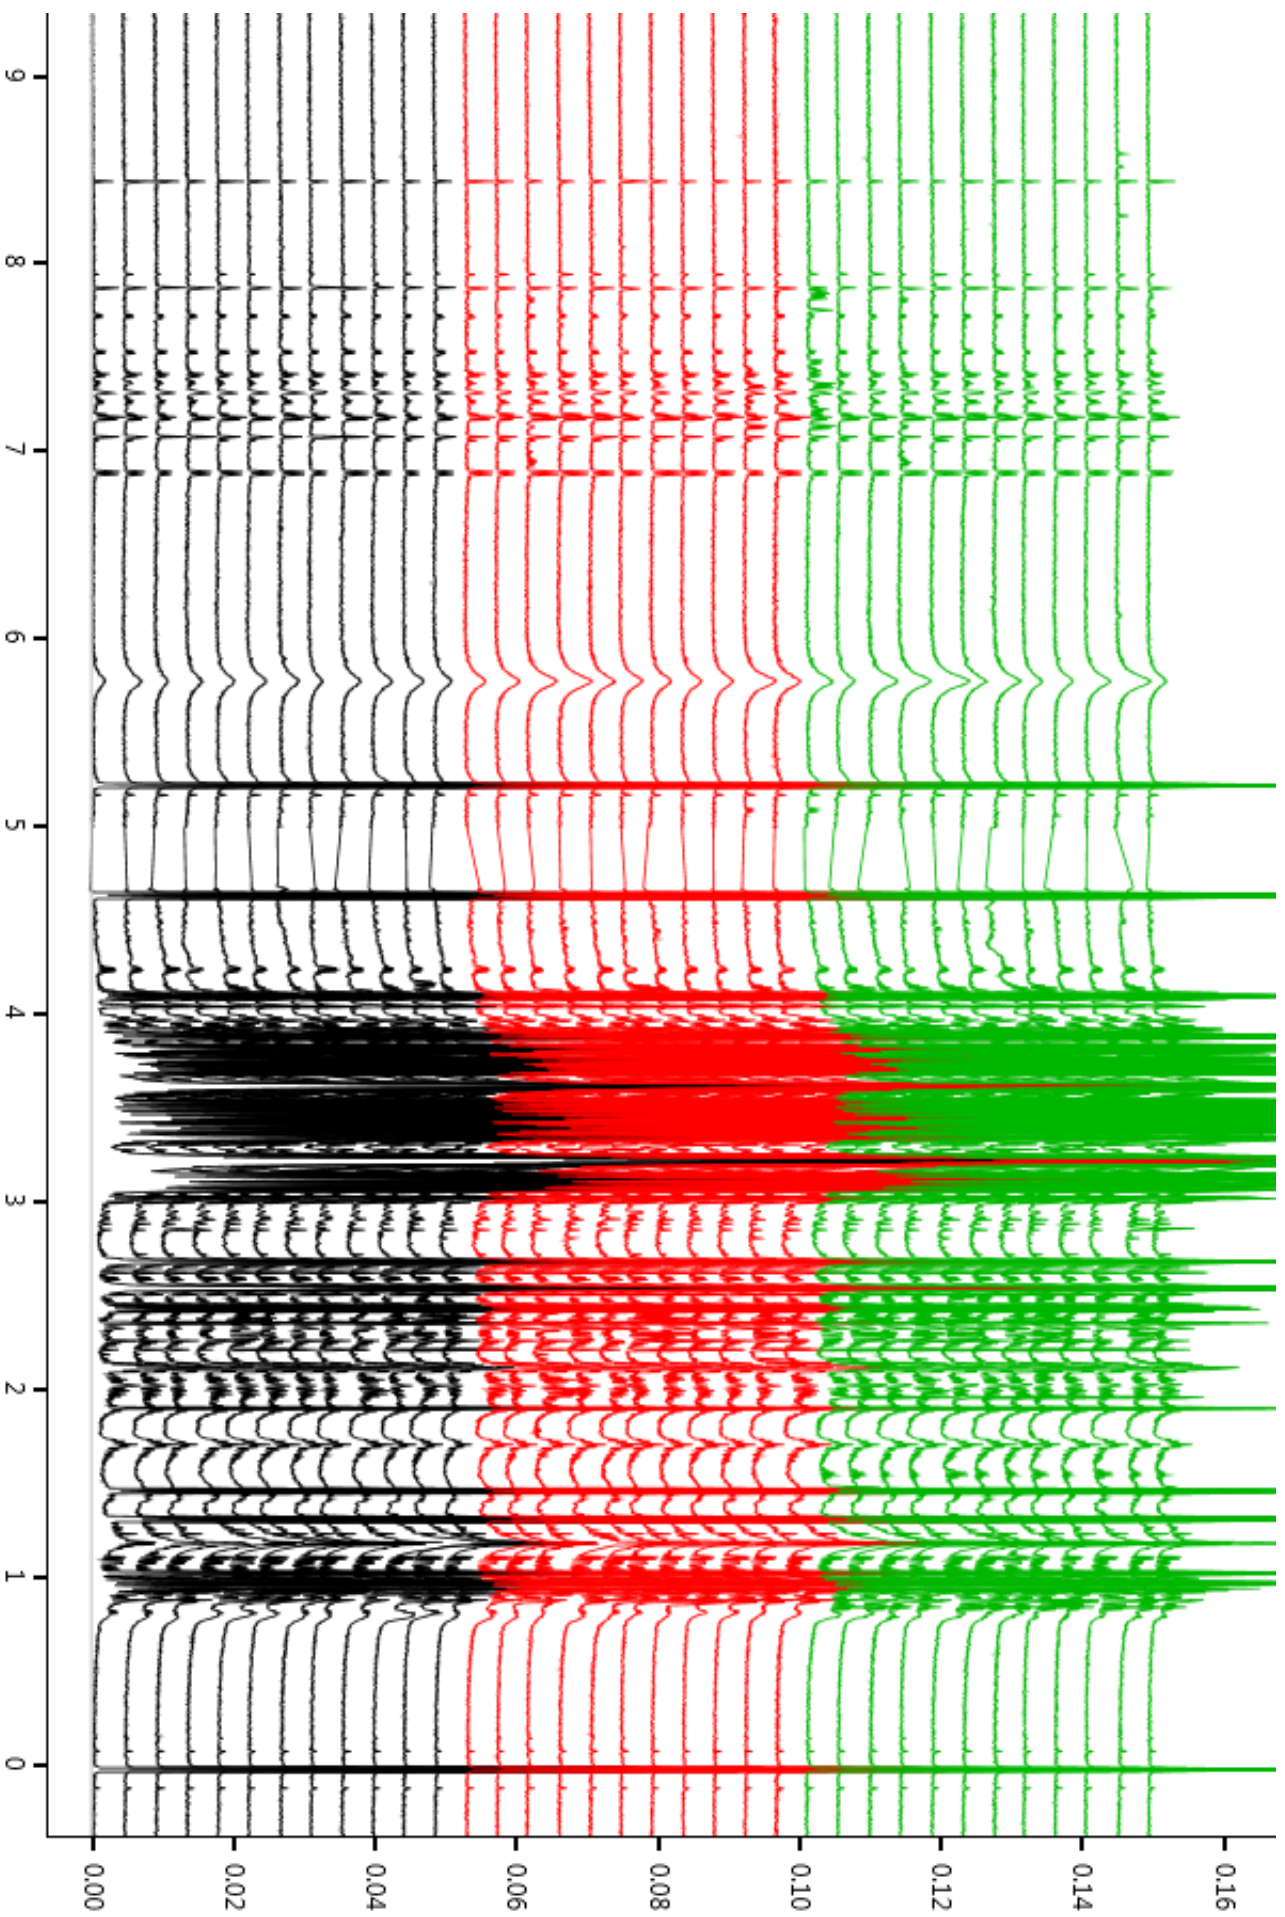

**Figure S1.** The plasma  $^1\text{H}$  NMR spectra of young adults, **older adults at baseline** and **older adults after n3-PUFA supplementation** (full scale)

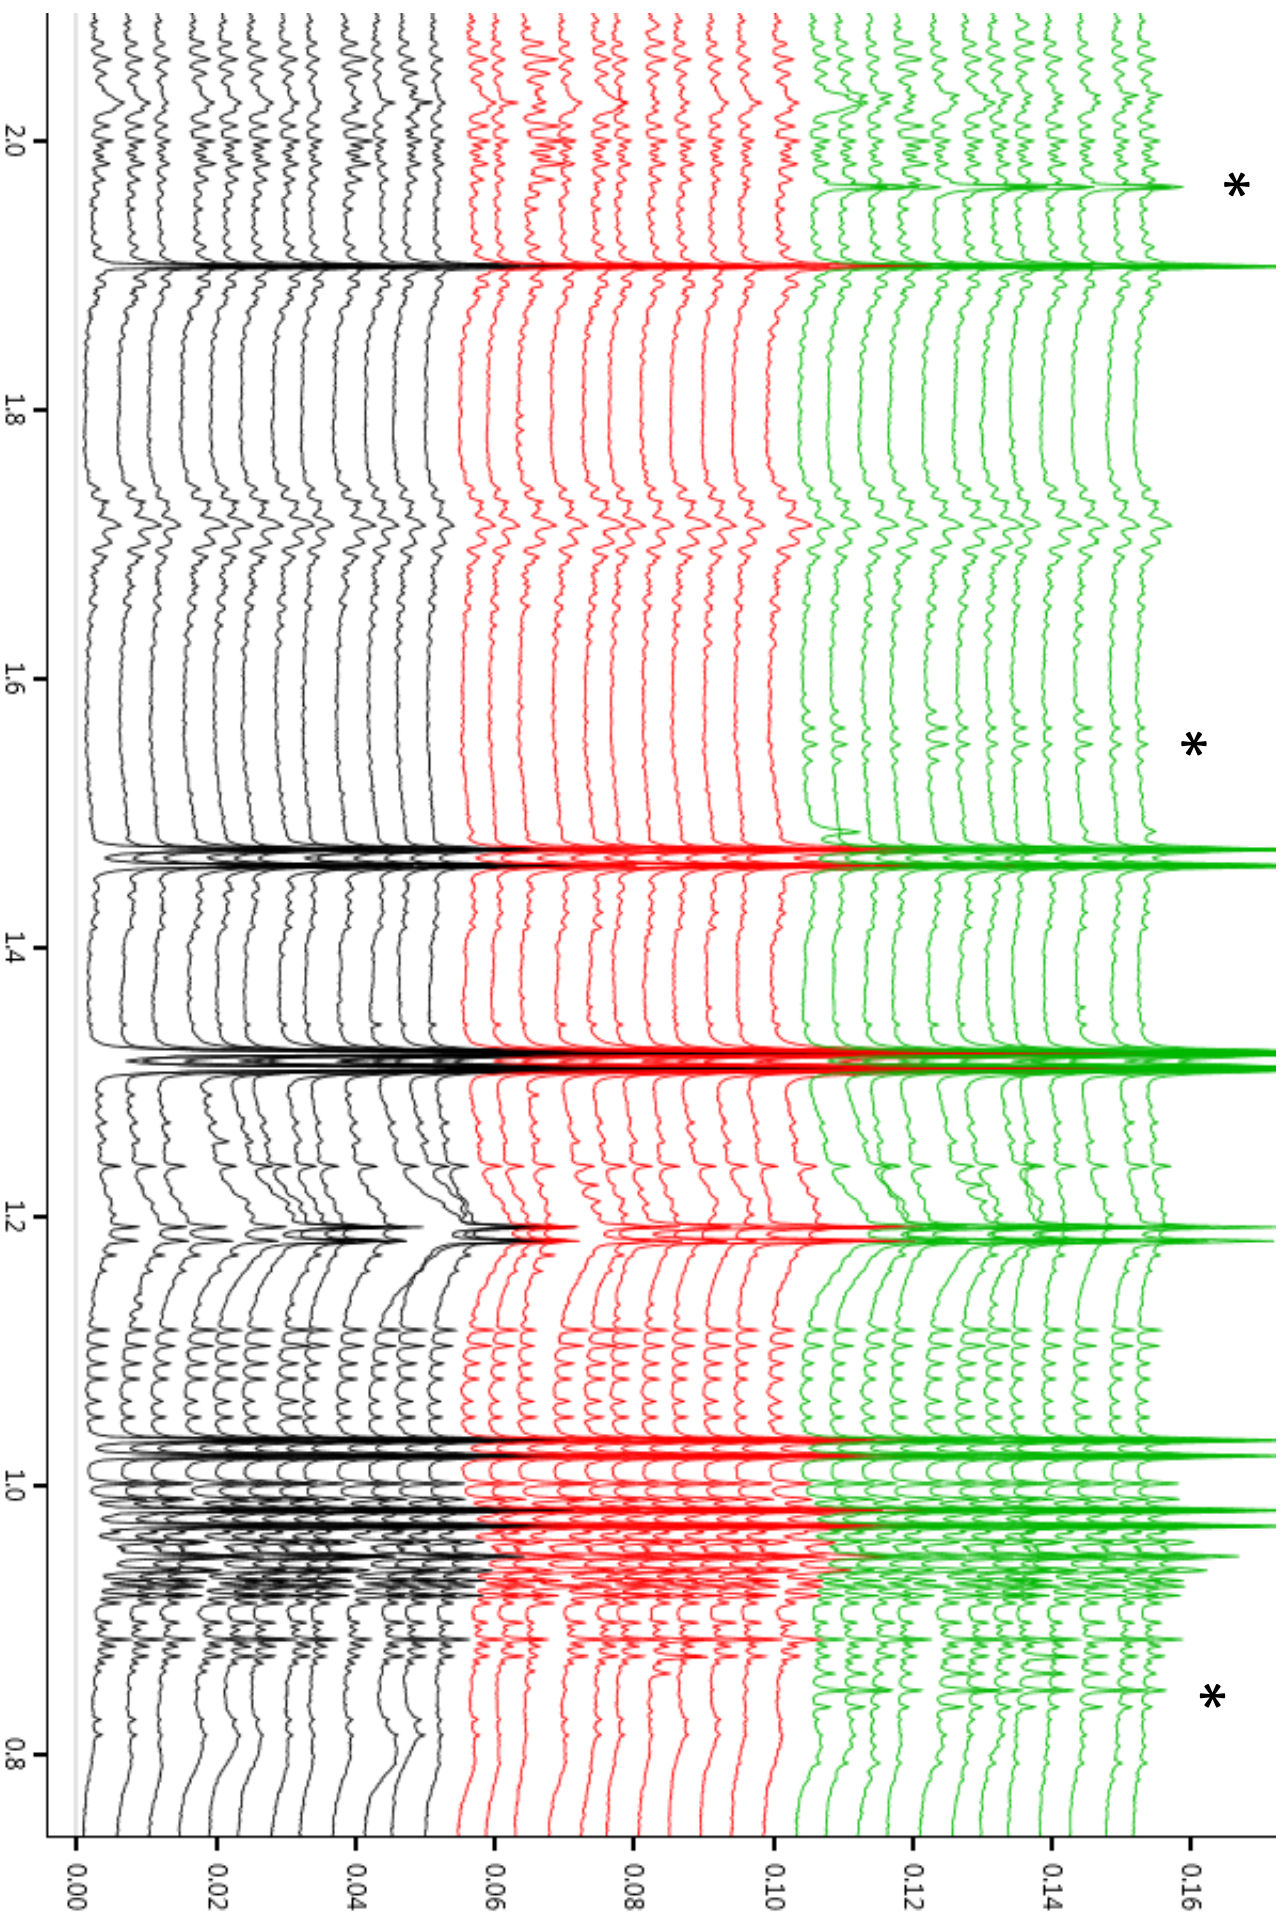

**Figure S2.** The plasma  $^1\text{H}$  NMR spectra expansion: the signals present only in older adults after n3-PUFA supplementation are indicated by \*

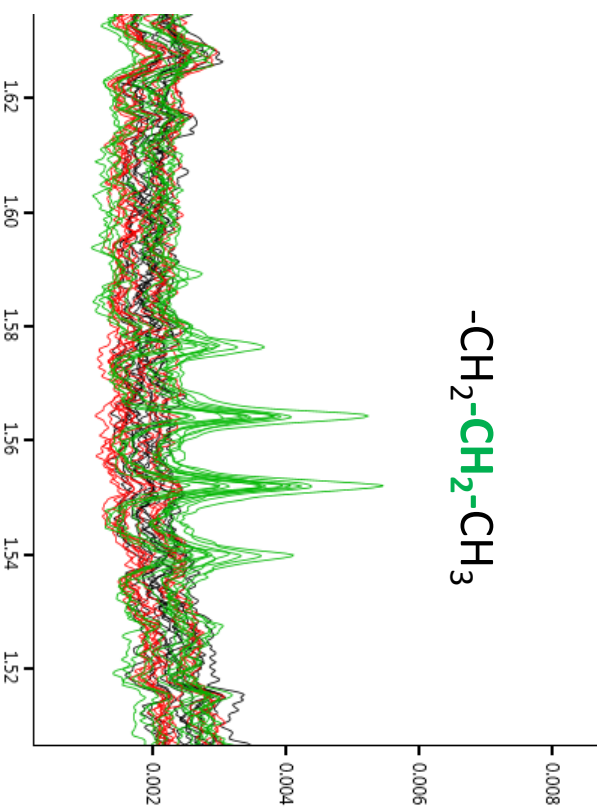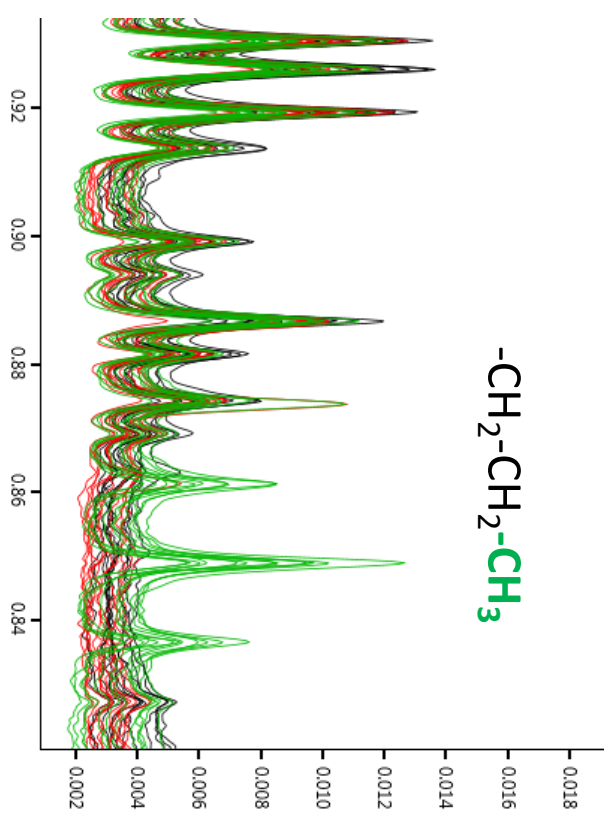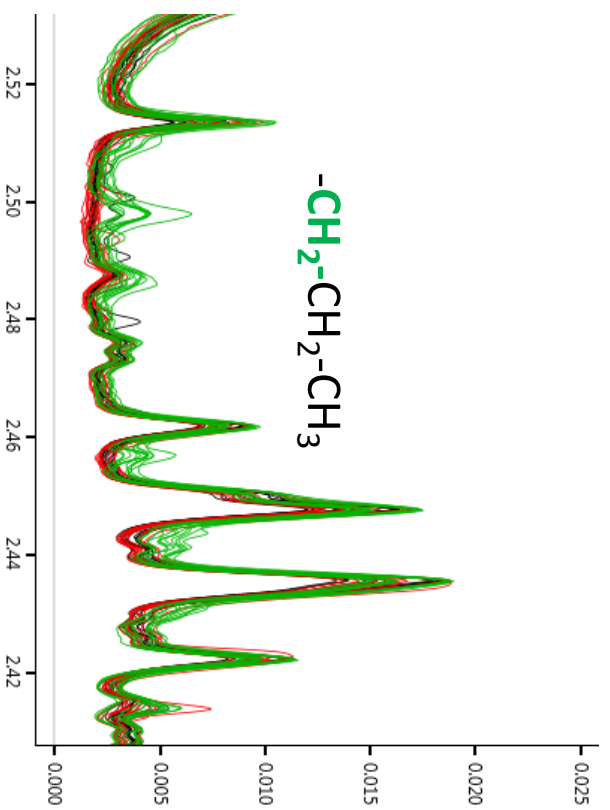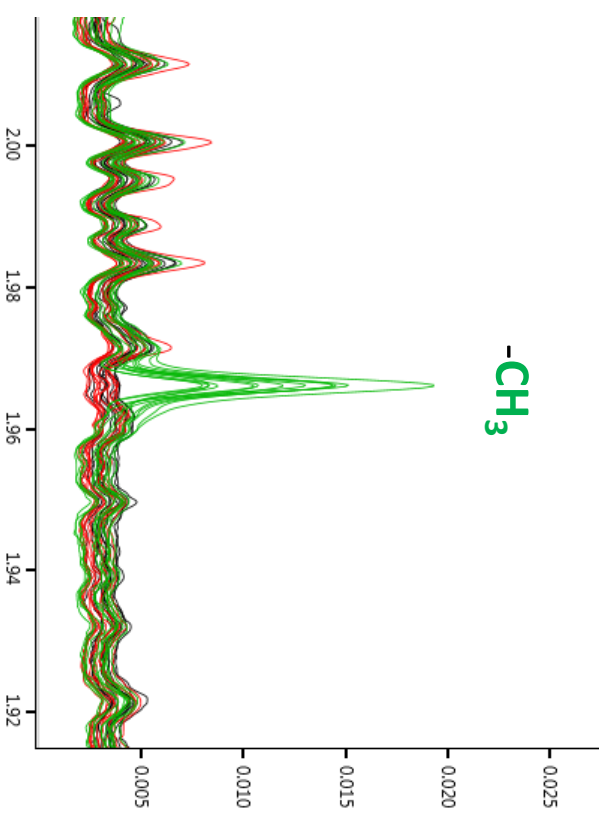

**Figure S3.**  $^1\text{H}$  NMR spectra overlays: the signals present only in older adults after n3-PUFA supplementation with the assignments



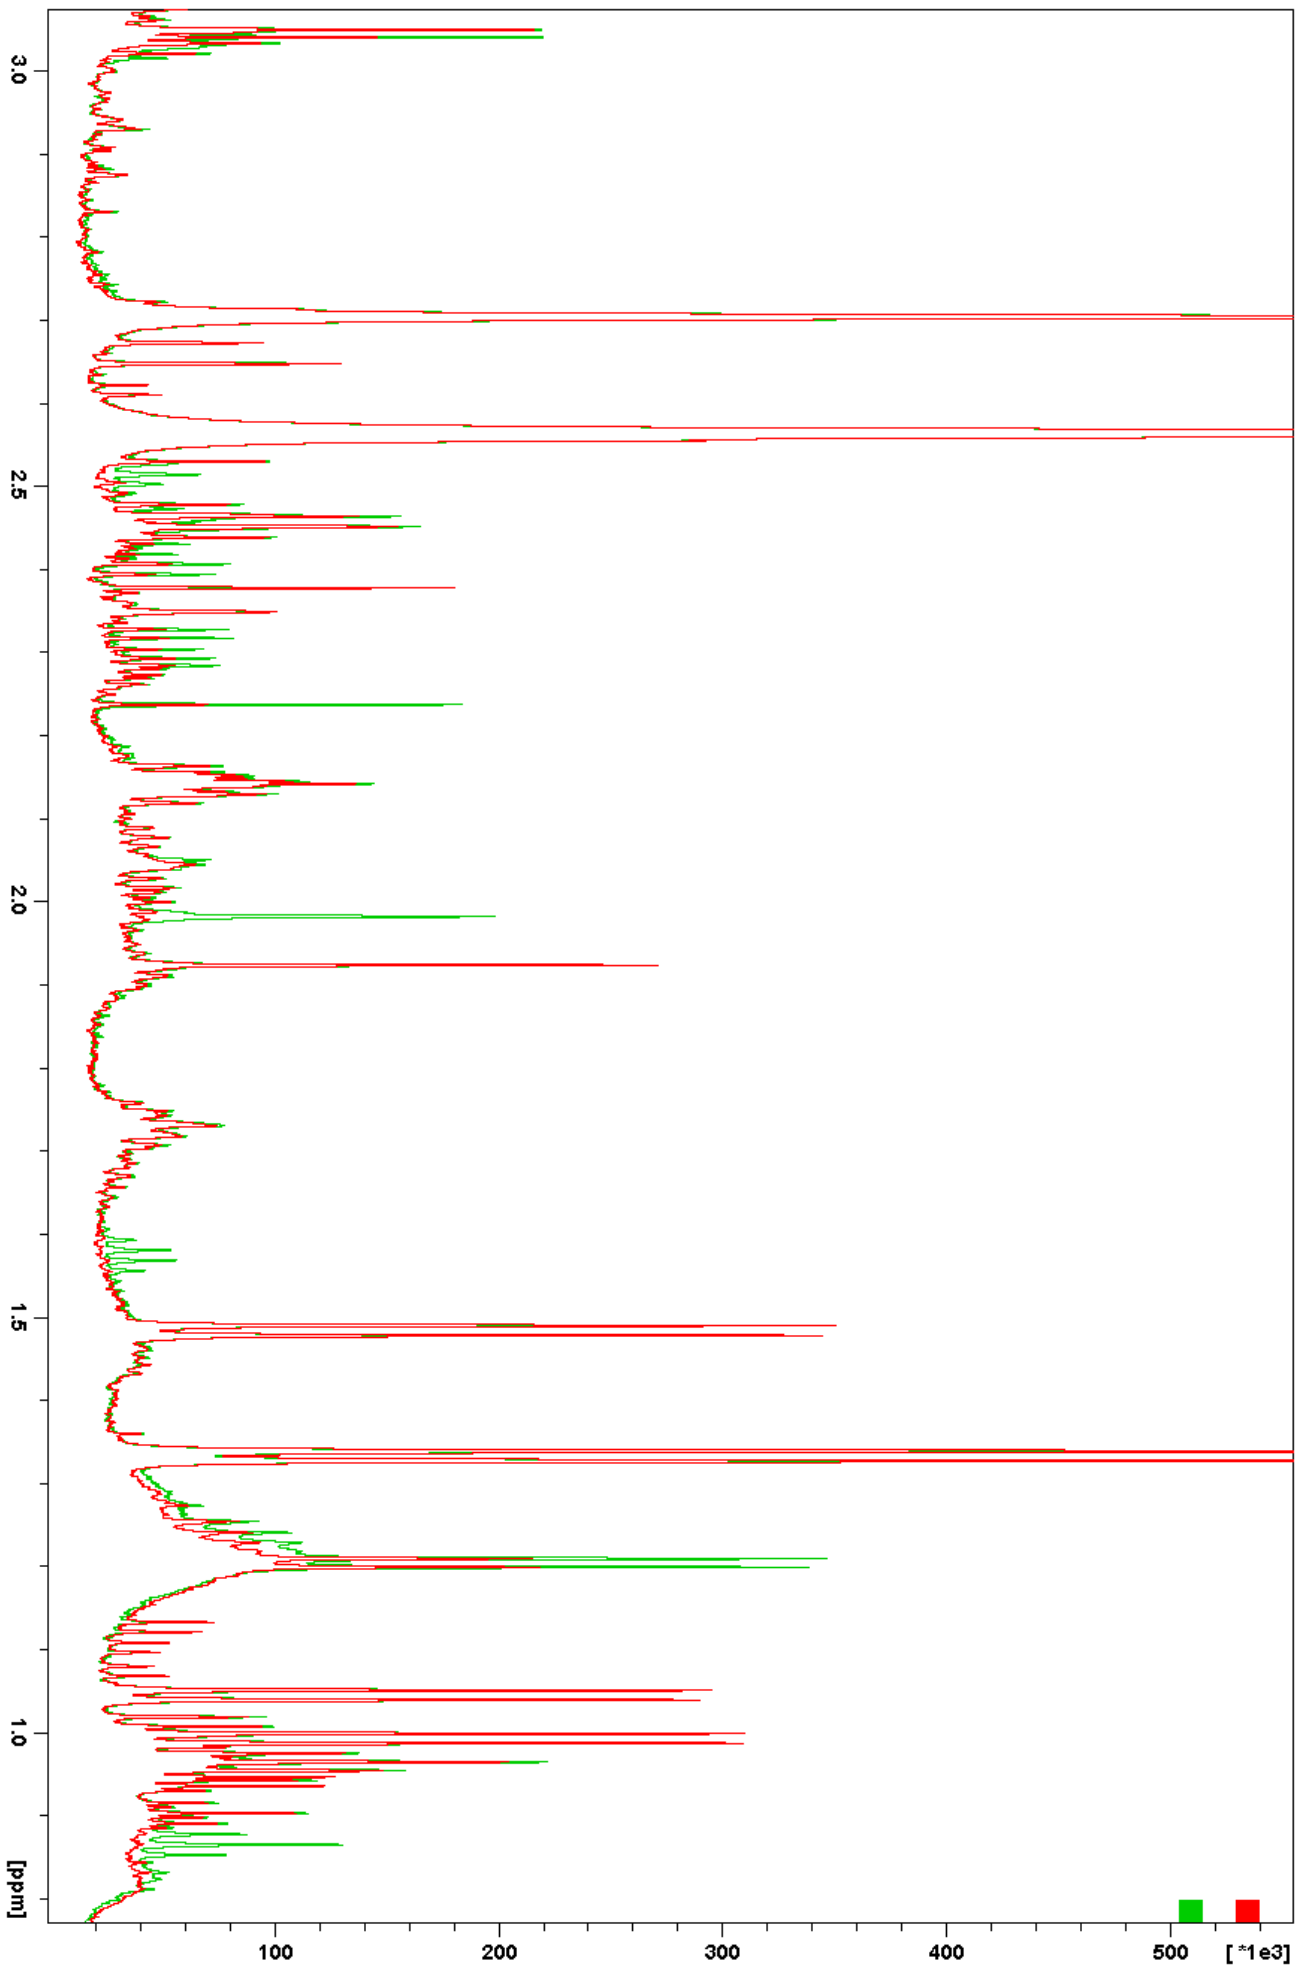

**Figure S4.** The comparison between <sup>1</sup>H NMR spectra of older adult **before** and **after** n3-PUFA supplementation

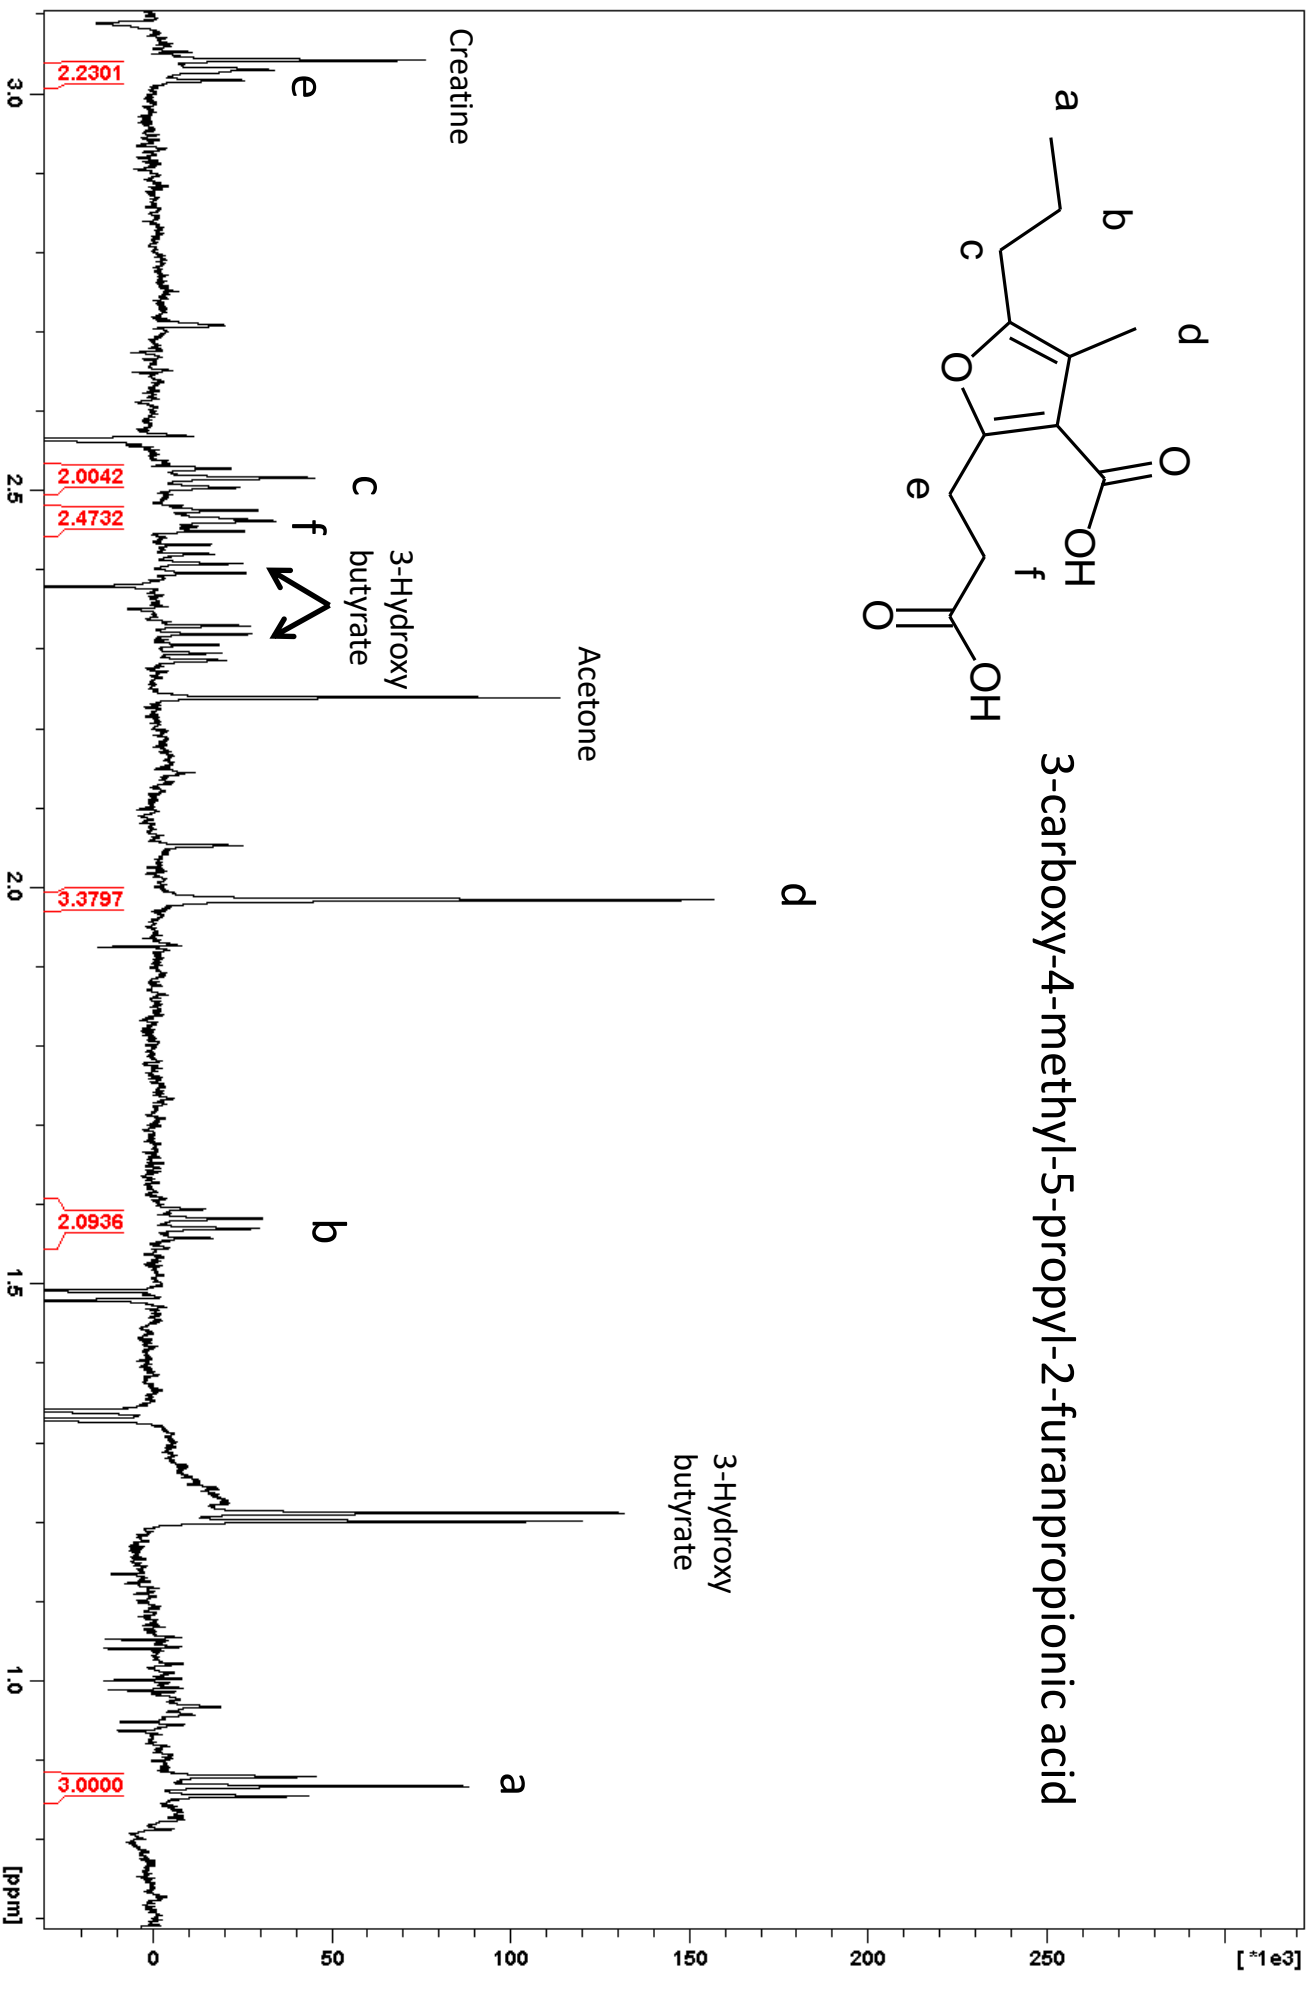

**Figure S5.** The <sup>1</sup>H NMR spectral difference between older adult before and after n3-PUFA supplementation with assignments

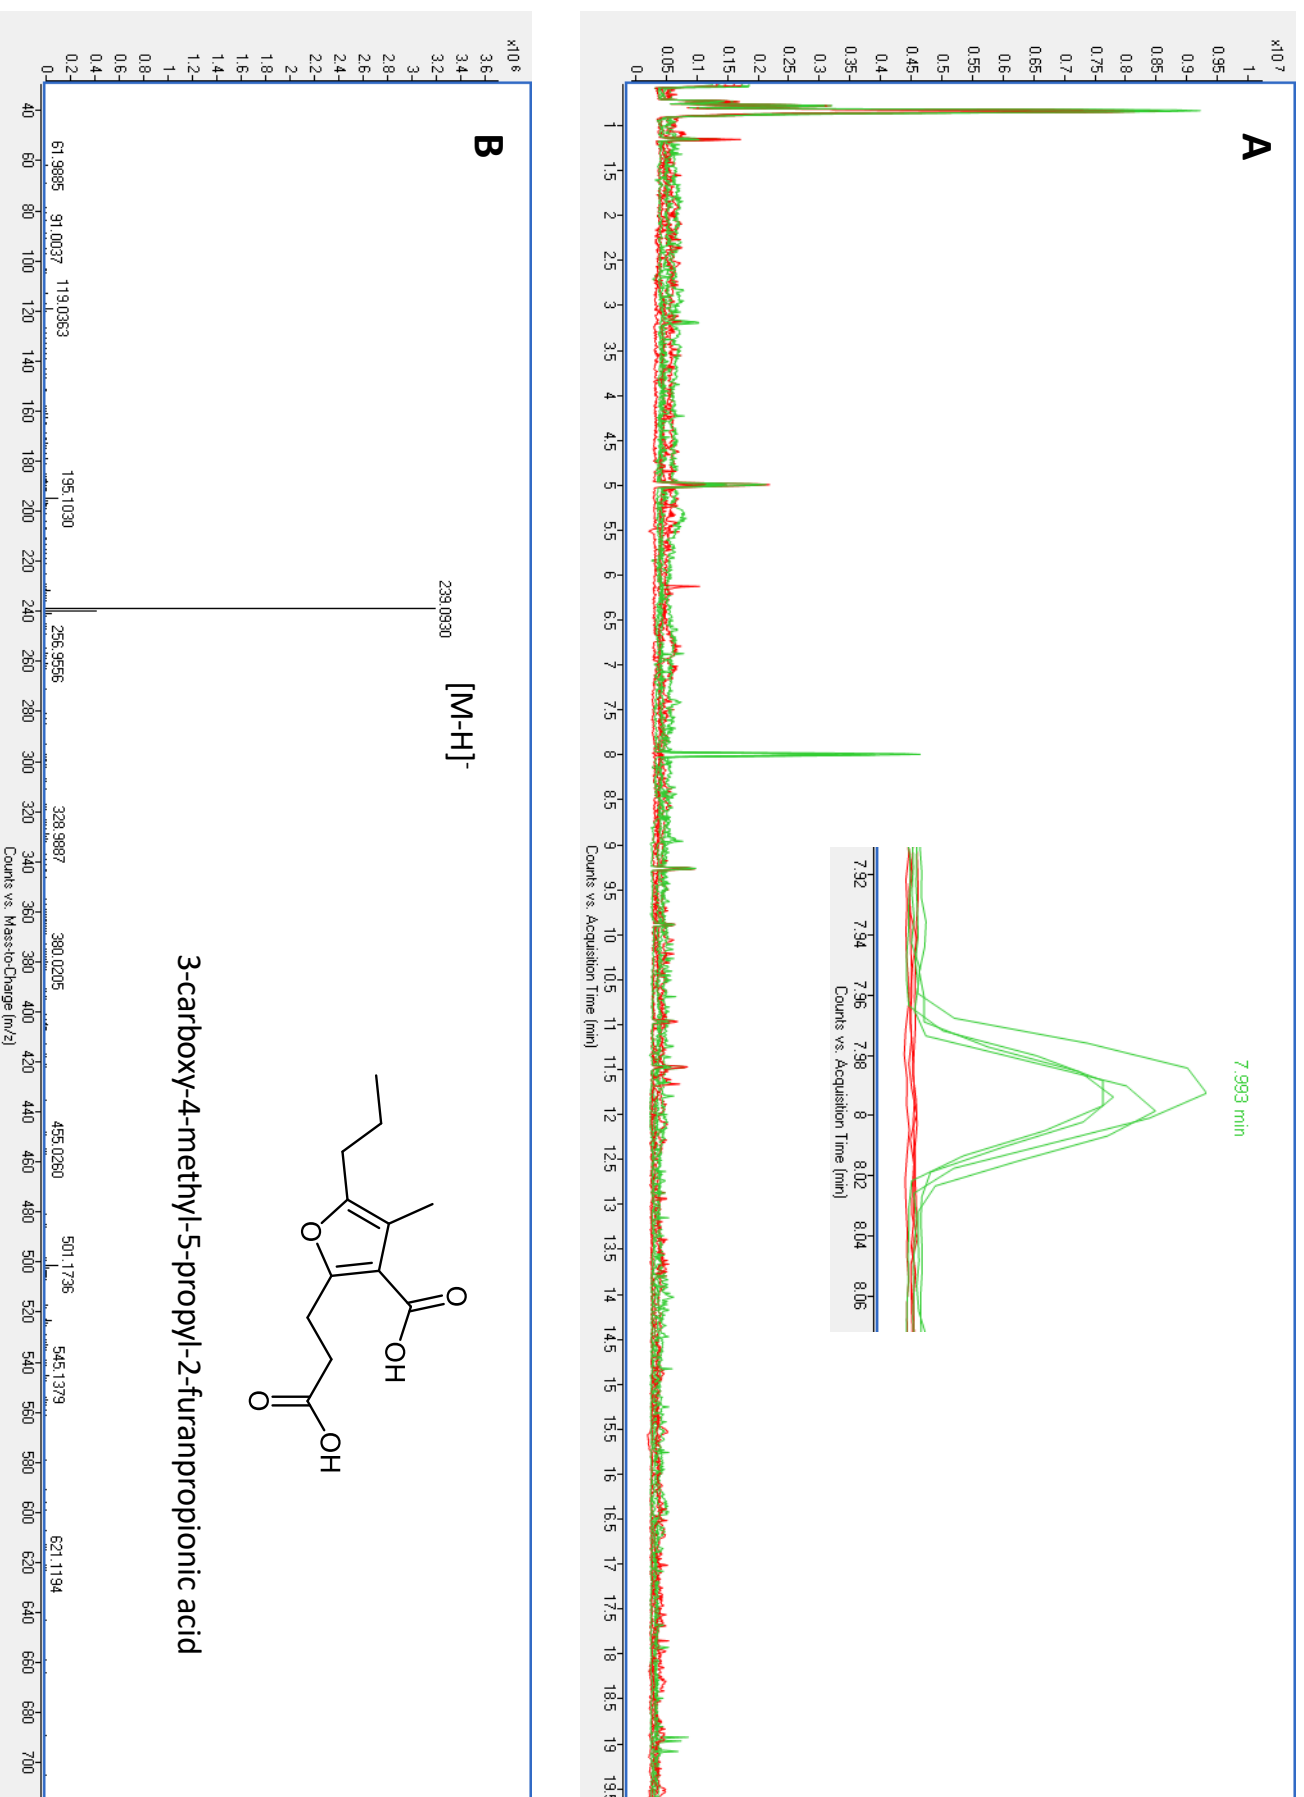

**Figure S6.** The plasma LC-MS chromatograms of four older adults **before** and **after n3-PUFA supplementation** (A) and negative ESI MS spectrum of the peak at 7.99 min

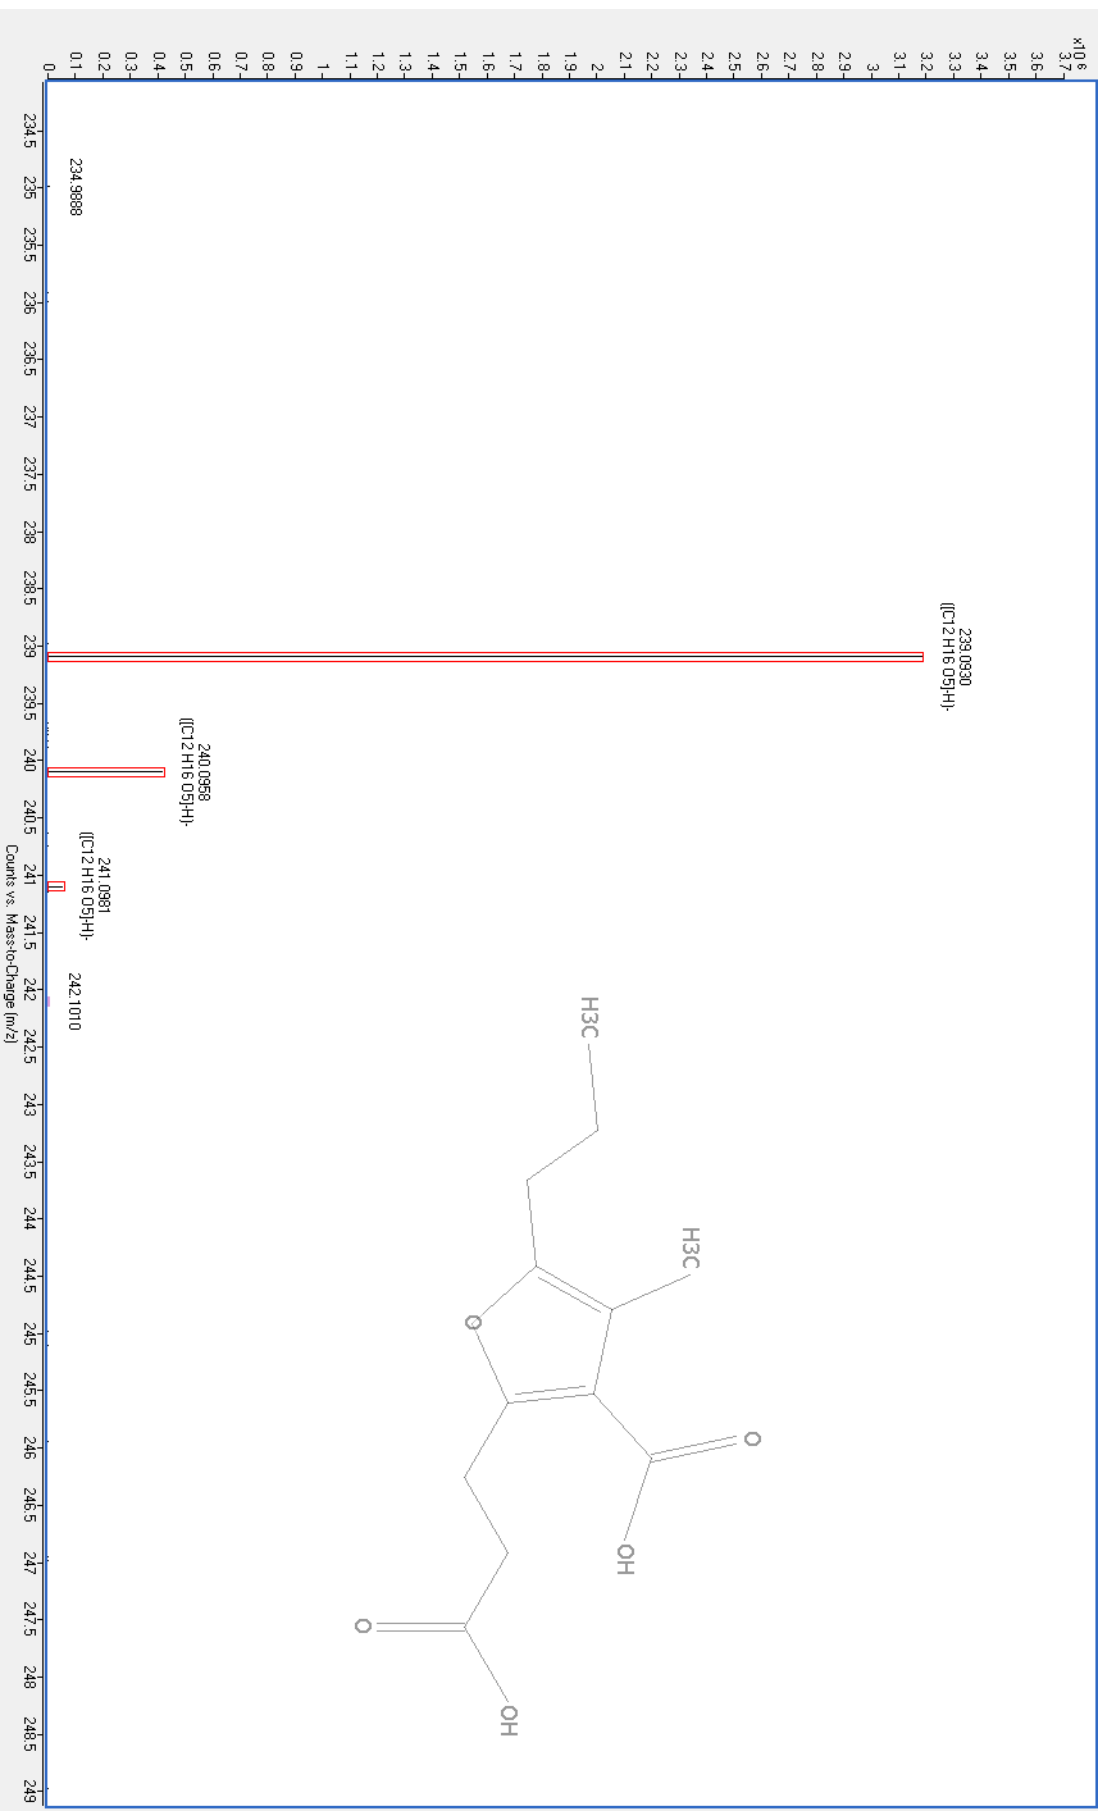

**Figure S7.** The library search (METLIN) of the negative ESI MS spectrum of the peak at 7.99 min

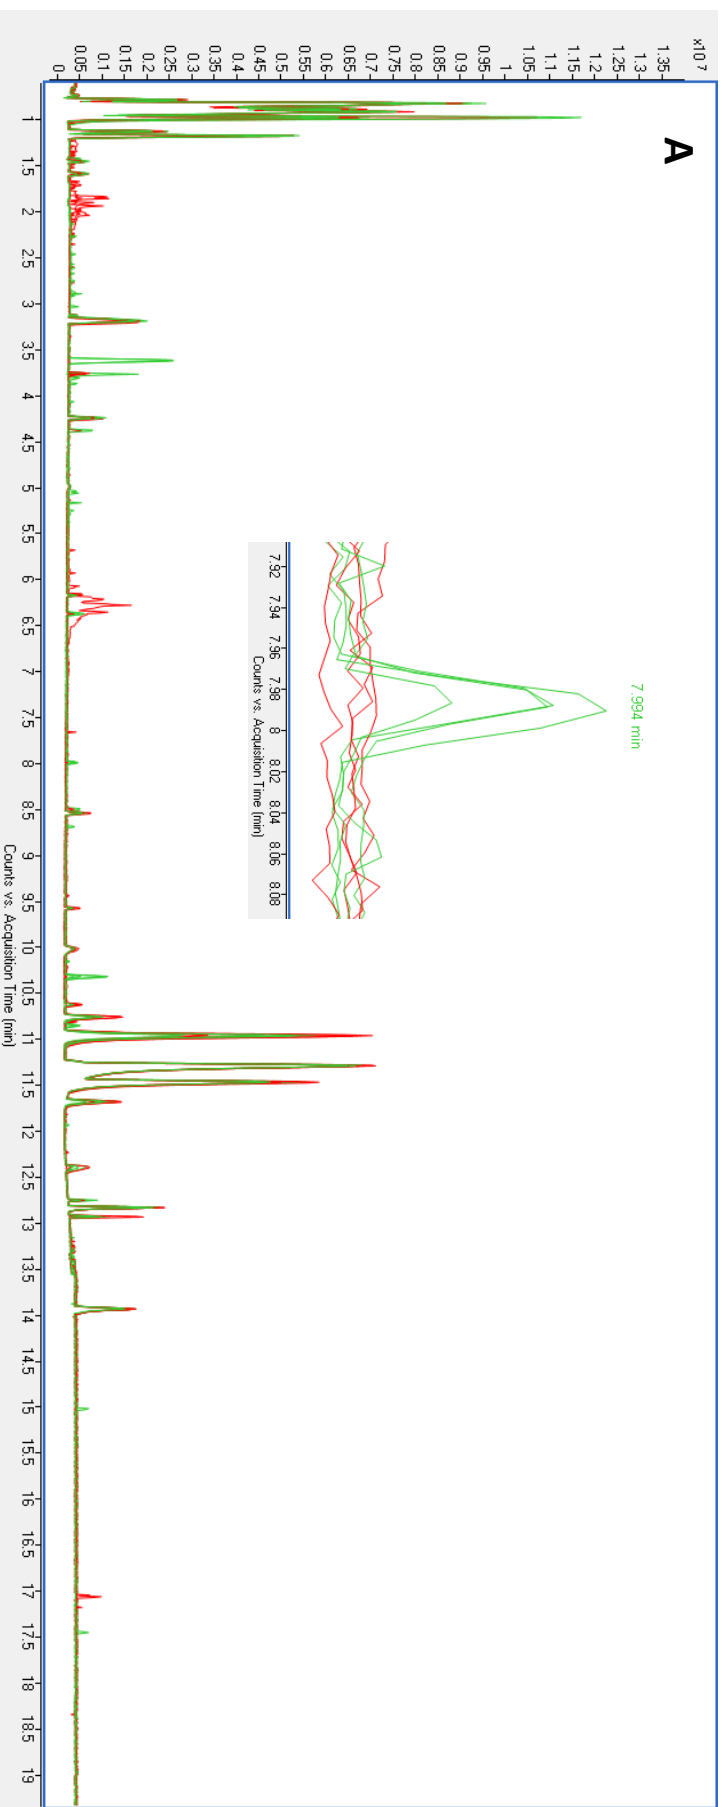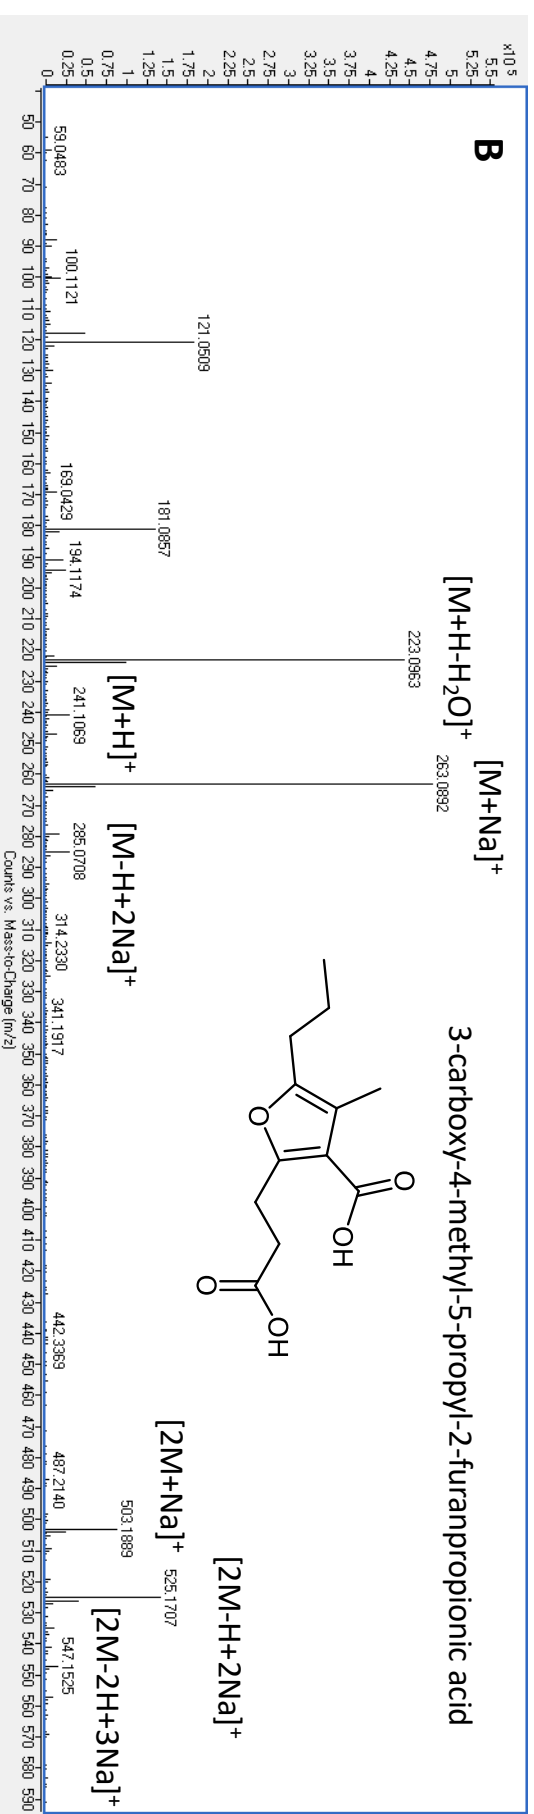

**Figure S8.** The plasma LC-MS chromatograms of four older adults **before** and **after n3-PUFA supplementation** (A) and positive ESI MS spectrum of the peak at 7.99 min



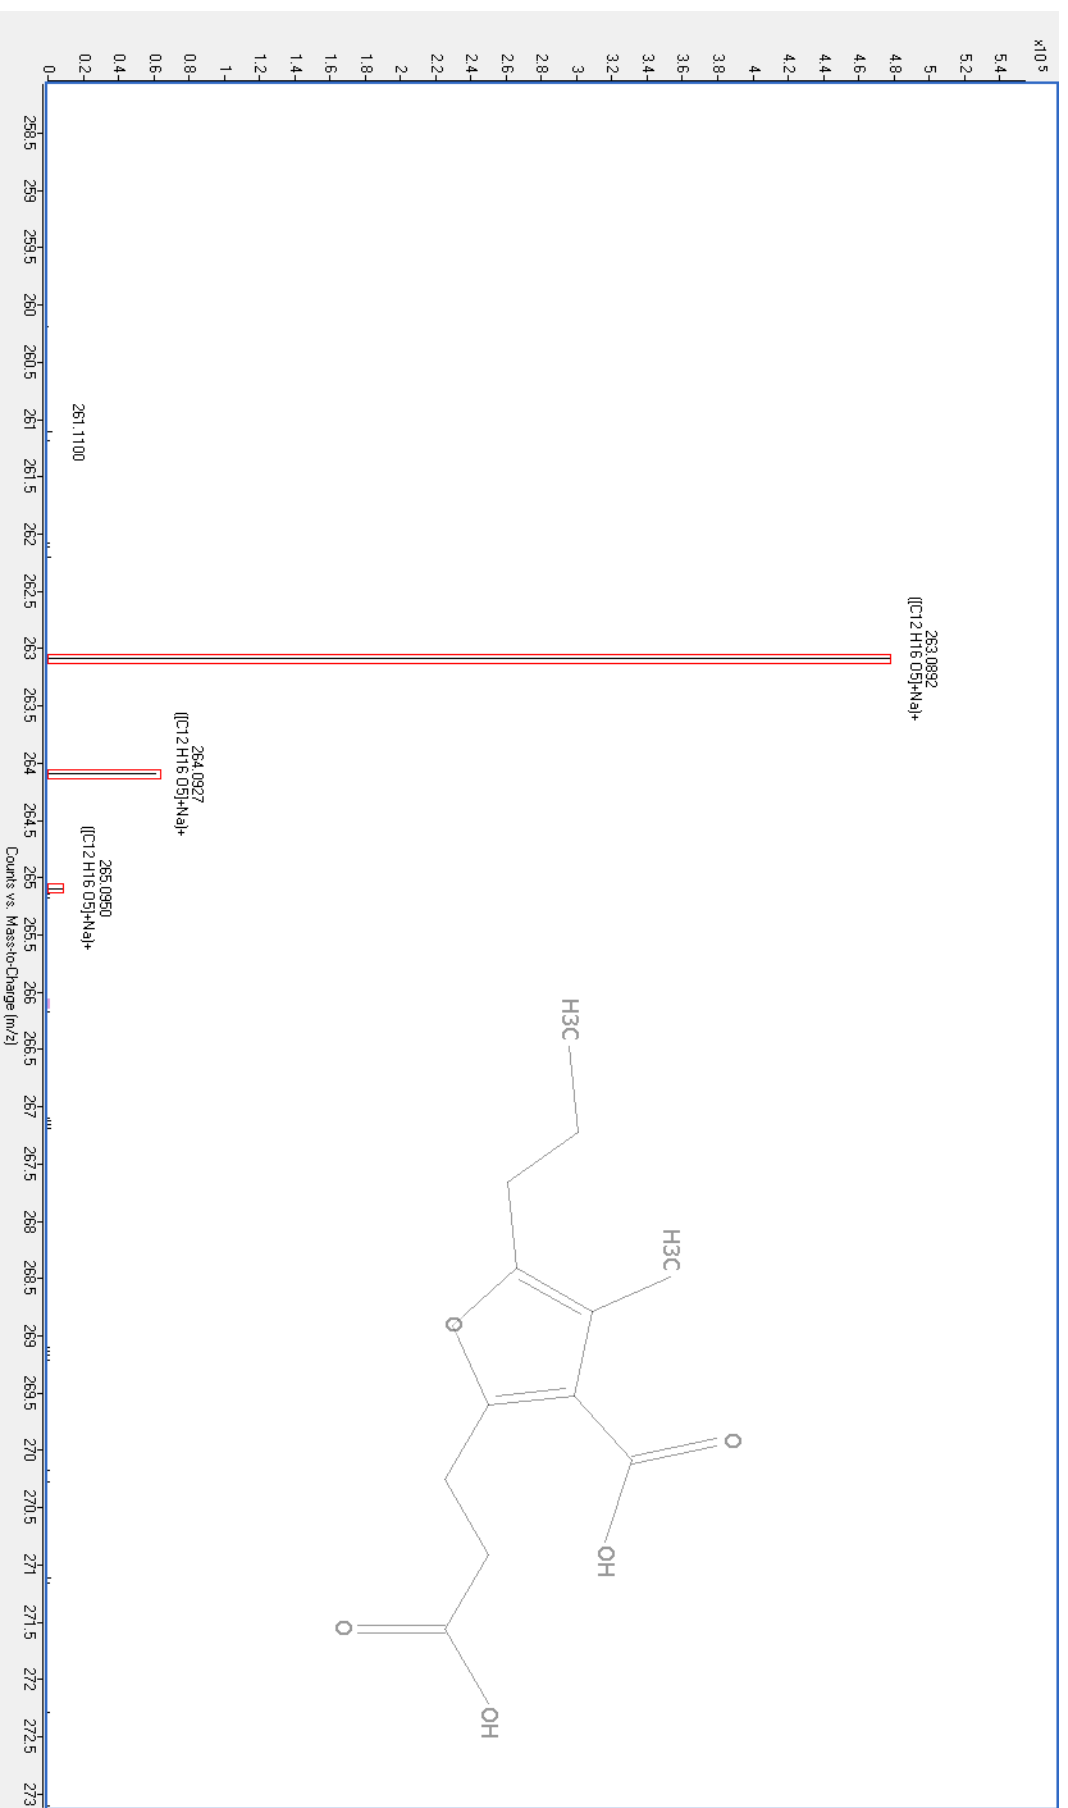

**Figure S9.** The library search (METLIN) of the positive ESI MS spectrum of the peak at 7.99 min

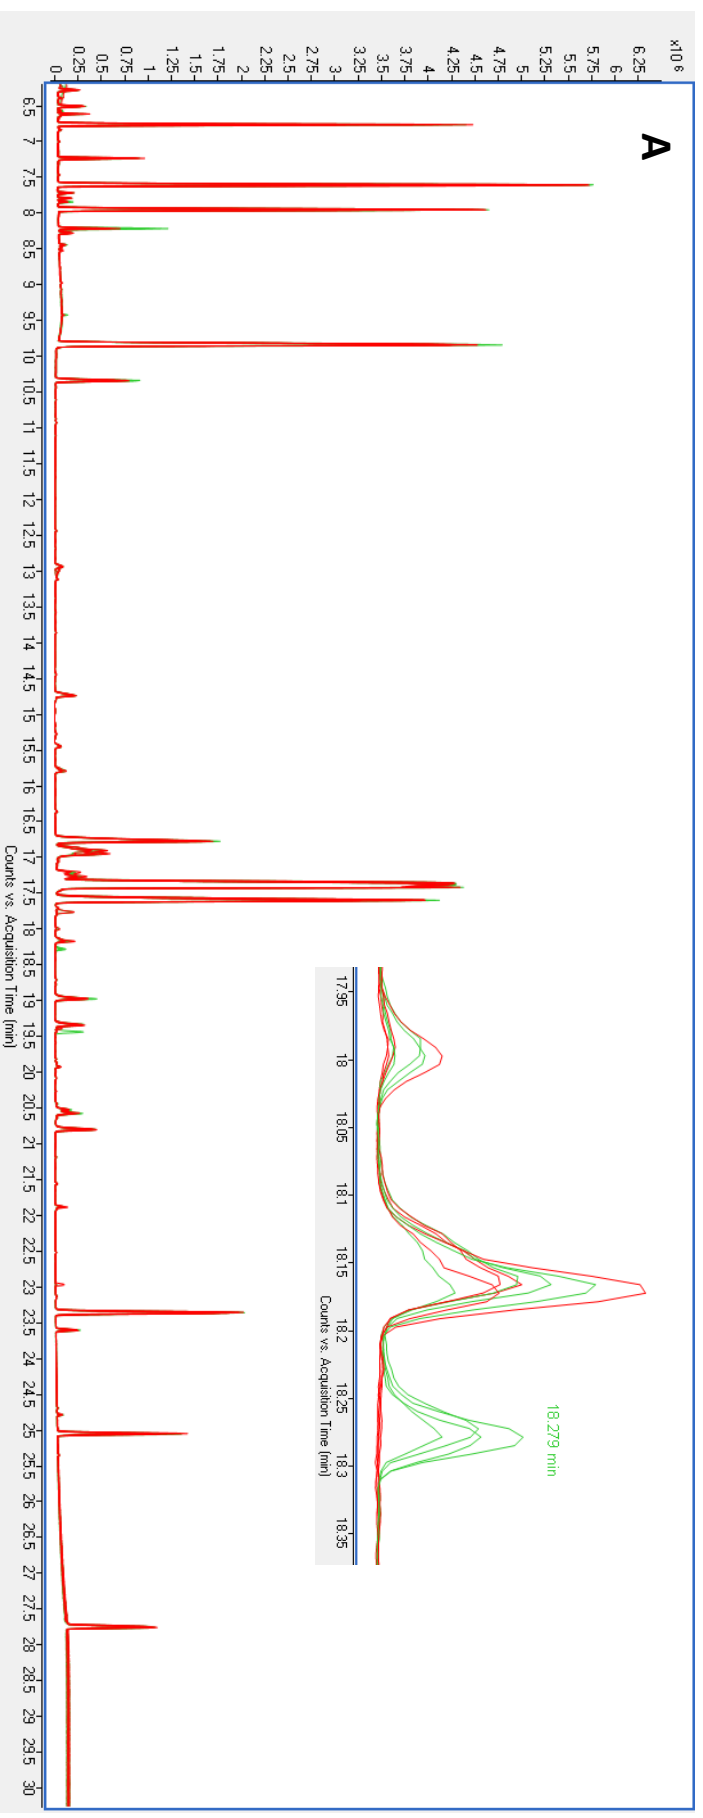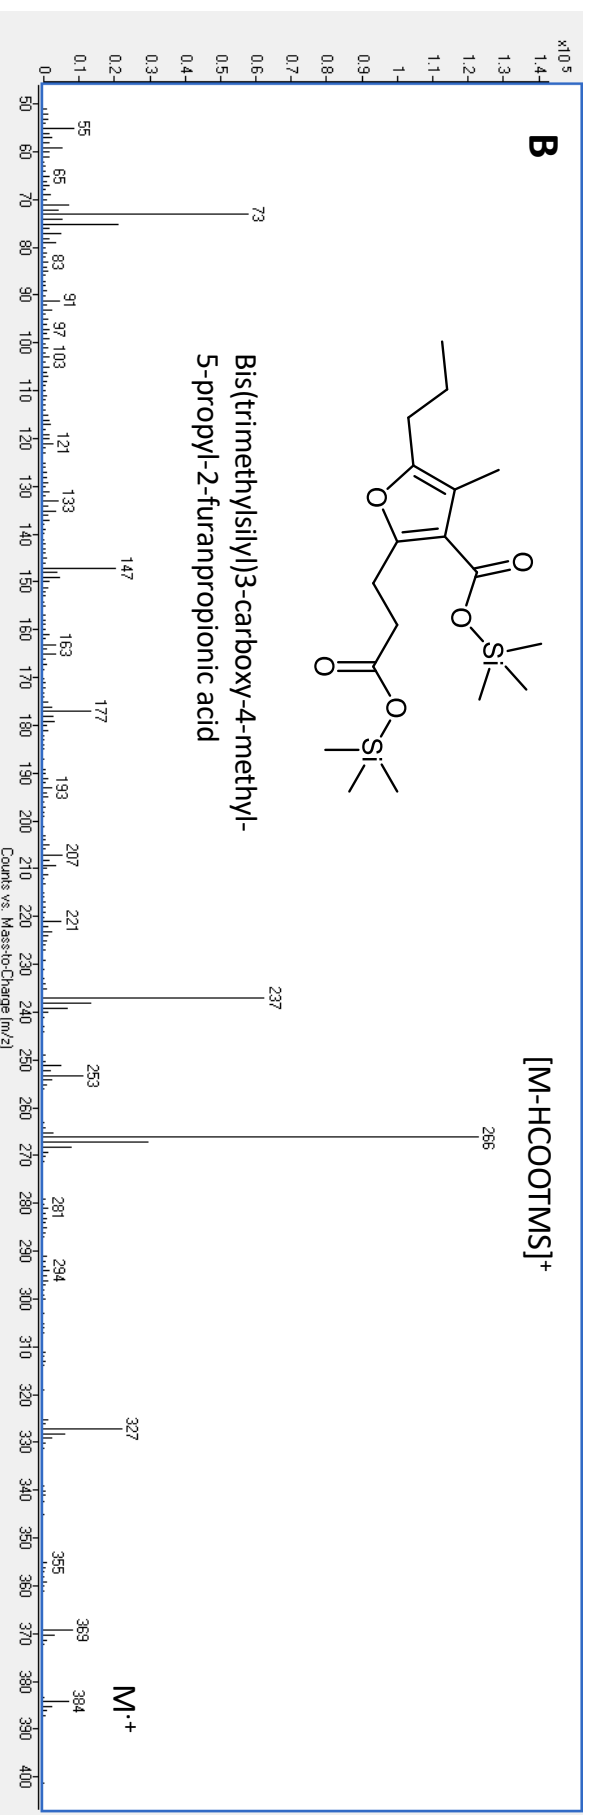

**Figure S10.** The plasma GC-MS chromatograms of four older adults **before** and **after** n3-PUFA supplementation (A) and positive EI MS spectrum of the peak at 18.28 min
